# Supplementary material for: Potato Cultivar Identification in South Africa Using a Custom SNP Panel
Source: MDPI journal article supplement (doi:10.3390/plants11121546), 2022-06-10
Supplement: s1 [file s1]

## Article

# Potato Cultivar Identification in South Africa Using a Custom SNP Panel

Inge Gazendam <sup>1,\*</sup>, Pinkie Mojapelo <sup>1</sup> and Michael W. Bairu <sup>1,2</sup>

## Supplementary Materials

**Table S1:** (pages 1-3). Potato germplasm list selected for KASP SNP assay verification (78 cultivars). GWK, FPD and FL at the “Reason for choice” refer to contributions made by GWK Trading, First Potato Dynamics and Pepsico (FL lines), respectively.

| gDNA# | Cultivar Name       | Source                                | Reason for choice      |
|-------|---------------------|---------------------------------------|------------------------|
| 5     | 7Four7              | Greenhouse – dried                    | GWK                    |
| 65    | 92-466-112          | Field                                 | Did SSR                |
| 64    | 94-0530-008 (Freek) | Field                                 | F. Steyn request       |
| 84    | 96-0568-002 (Arno)  | Field                                 | McCain request         |
| 93    | 96-232-27           | Field                                 | Did SSR                |
| 192   | Adato               | <i>In vitro</i> planted in greenhouse | FPD                    |
| 101   | Amethyst            | Field                                 | F. Steyn request       |
| 119   | Amigo               | <i>In vitro</i>                       | McCain request         |
| 1     | Avalanche           | Greenhouse                            | FPD                    |
| 6     | Belmonda            | Greenhouse                            | GWK                    |
| 124   | BP1 (APO)           | <i>In vitro</i>                       | Commercially important |
| 92    | BP1 2018            | Field                                 | Commercially important |
| 50    | Buffelspoort        | Field                                 | Commercially important |
| 97    | Caren               | Field                                 | Commercially important |
| 13    | Connect             | Greenhouse                            | GWK                    |
| 130   | COO2321             | <i>In vitro</i>                       | Did SSR                |
| 131   | Crispin             | <i>In vitro</i>                       | Did SSR                |
| 132   | Crop34              | <i>In vitro</i>                       | SA Variety list        |
| 133   | Crop60 2484         | <i>In vitro</i>                       | McCain request         |
| 134   | Cwater Russet       | <i>In vitro</i>                       | McCain request         |
| 135   | Daisy               | <i>In vitro</i>                       | Commercially smaller   |
| 136   | DakotaTrailblazr    | <i>In vitro</i>                       | McCain request         |
| 137   | Darius              | <i>In vitro</i>                       | Commercially important |
| 66    | Devlin              | Field                                 | SA Variety list        |
| 138   | Donata              | <i>In vitro</i>                       | SA Variety list        |
| 116   | DTO33               | Field                                 | F. Steyn request       |
| 140   | Elodie              | <i>In vitro</i>                       | Did SSR                |
| 44    | Elsa                | Field                                 | F. Steyn request       |
| 31    | Eryn                | Field                                 | Commercially smaller   |

|     |                   |                                       |                        |
|-----|-------------------|---------------------------------------|------------------------|
| 141 | Esco              | <i>In vitro</i>                       | SA Variety list        |
| 143 | Evan              | <i>In vitro</i>                       | SA Variety list        |
| 85  | Fabian            | Field                                 | SA Variety list        |
| 144 | Fianna            | <i>In vitro</i> planted in greenhouse | Commercially important |
| 193 | FL2006            | <i>In vitro</i> planted in greenhouse | FL                     |
| 194 | FL2108            | <i>In vitro</i> planted in greenhouse | FL                     |
| 195 | FL2476            | <i>In vitro</i>                       | FL                     |
| 147 | Frodo             | <i>In vitro</i>                       | SA Variety list        |
| 150 | Hermes            | <i>In vitro</i>                       | Commercially smaller   |
| 82  | Hertha (Rascals)  | Field                                 | Commercially important |
| 10  | IIZA49A1          | Greenhouse                            | GWK                    |
| 9   | IIZASSA5          | Greenhouse                            | GWK                    |
| 152 | Innovator         | <i>In vitro</i> planted in greenhouse | Commercially important |
| 79  | Jelly             | Field                                 | SA Variety list        |
| 4   | King Russet       | Greenhouse                            | GWK                    |
| 155 | Kingsman          | <i>In vitro</i>                       | Did SSR                |
| 70  | Koos Smit         | Field                                 | F. Steyn request       |
| 81  | Lady Rosetta      | Field                                 | Commercially important |
| 11  | Lanorma           | Greenhouse                            | GWK                    |
| 112 | Liseta (Rascals)  | Field                                 | Commercially smaller   |
| 158 | Magnum            | <i>In vitro</i>                       | McCain request         |
| 118 | Marijke           | Field                                 | SA Variety list        |
| 75  | Maris Piper       | Field                                 | Vos gt                 |
| 107 | Marispeer         | Field                                 | Choose more            |
| 160 | Markies           | <i>In vitro</i>                       | FPD                    |
| 117 | Mnandi            | Field                                 | Commercially smaller   |
| 76  | Mondial           | Field                                 | Commercially important |
| 27  | Mondial (Rascals) | Field                                 | Commercially important |
| 161 | Monica russet     | <i>In vitro</i>                       | McCain request         |
| 164 | Moonlight         | <i>In vitro</i> planted in greenhouse | Did SSR                |
| 7   | Noya              | Greenhouse                            | GWK                    |
| 14  | Panamera          | Leaf sample - dried                   | Commercially important |
| 168 | PentlandDell      | <i>In vitro</i>                       | Commercially important |
| 12  | Prada             | Greenhouse                            | GWK                    |
| 171 | Rotharo           | <i>In vitro</i>                       | SA Variety list        |
| 3   | Royal             | Greenhouse                            | GWK                    |
| 173 | Russet Burbank    | <i>In vitro</i>                       | SA Variety list        |
| 177 | Sandvelder        | <i>In vitro</i>                       | SA Variety list        |
| 180 | Shepody           | <i>In vitro</i>                       | Commercially smaller   |
| 181 | Sifra             | <i>In vitro</i>                       | Commercially important |
| 196 | Sound             | <i>In vitro</i> planted in greenhouse | FPD                    |
| 182 | Spunta            | <i>In vitro</i>                       | SA Variety list        |

---

|     |                 |                     |                        |
|-----|-----------------|---------------------|------------------------|
| 8   | Taisiya         | Greenhouse - dried  | GWK                    |
| 15  | Taurus          | Leaf sample - dried | Commercially important |
| 183 | Teton Russet    | <i>In vitro</i>     | McCain request         |
| 29  | Up to Date 2007 | Field               | Commercially important |
| 187 | Up to Date 2012 | <i>In vitro</i>     | Commercially important |
| 2   | Valor           | Greenhouse          | Commercially important |
| 189 | VanDerPlank     | <i>In vitro</i>     | Commercially important |

---

**Table S2:** (pages 1-4). Database of SNP genotypes of selected potato cultivars as obtained from SeqSNP and KASP SNP assays at 23 SNP positions. The reference allele dosage is indicated as a number between 0 and 4.

| gDNA# | Cultivar name       | Genotype | KASP SNP assay |    |    |    |    |   |    |    |    |    |    |    |    |    |    |    |   |    |    |    |    |    |    |   |
|-------|---------------------|----------|----------------|----|----|----|----|---|----|----|----|----|----|----|----|----|----|----|---|----|----|----|----|----|----|---|
|       |                     |          | A              | C  | D  | E  | F  | G | H  | J  | K  | L  | M  | N  | O  | P  | Q  | R  | S | T  | U  | V  | W  | X  | Y  |   |
| 5     | 7Four7              | SeqSNP   | 4              | 0  | 3  | 3  | 3  | 0 | 3  | 1  | 3  | 3  | 2  | 2  | 3  | 1  | 3  | 2  | 3 | 2  | 0  | 3  | 2  | 2  | 3  |   |
| 5     | 7Four7              | KASP     | 4              | 0  | 3  | 3  | 3  | 0 | 3  | 1  | 3  | 3  | 2  | 2  | 3  | 1  | 3  | 2  | 3 | 2  | 0  | 3  | 2  | 2  | 3  |   |
| 54    | 890/20              | SeqSNP   | 3              | 1  | 3  | 1  | 2  | 1 | 3  | 3  | 4  | 2  | 3  | 4  | 2  | 1  | 1  | 2  | 2 | 2  | 2  | 2  | 3  | 3  | 1  |   |
| 86    | 92-0472-042         | SeqSNP   | 1              | 1  | 1  | 1  | 2  | 2 | 3  | 1  | 1  | 2  | 2  | 3  | 2  | 1  | 1  | 2  | 1 | 2  | 0  | 1  | 2  | 2  | 3  |   |
| 65    | 92-466-112          | SeqSNP   | 3              | 2  | 1  | 0  | 4  | 1 | 0  | 1  | 1  | 0  | 3  | 2  | 3  | 1  | 0  | 2  | 3 | 2  | 2  | 1  | 3  | 3  | 3  |   |
| 65    | 92-466-112          | KASP     | 3              | 2  | 1  | 0  | 4  | 1 | 0  | 1  | 1  | 0  | 3  | 2  | 3  | 1  | 0  | 2  | 3 | 2  | 2  | 1  | 3  | 3  | 3  |   |
| 64    | 94-0530-008 (Freek) | SeqSNP   | 2              | 0  | 2  | 1  | 2  | 2 | 2  | 1  | 2  | 2  | 3  | 2  | 4  | 2  | 1  | 1  | 1 | 1  | 1  | 1  | 2  | 3  | 3  |   |
| 64    | 94-0530-008 (Freek) | KASP     | 2              | 0  | 2  | 1  | 2  | 2 | 2  | 1  | 2  | 2  | 3  | 2  | 4  | 2  | 1  | 1  | 1 | 1  | 1  | 1  | 2  | 3  | 3  |   |
| 100   | 95-521-126          | SeqSNP   | 2              | 0  | 1  | 0  | 2  | 3 | 2  | 1  | 1  | 2  | 1  | 2  | 3  | 0  | 1  | 3  | 3 | 3  | 2  | 0  | 3  | 2  | 3  |   |
| 84    | 96-0568-002 (Arno)  | SeqSNP   | 3              | 4  | 2  | 2  | 1  | 2 | 3  | 2  | 1  | 4  | 0  | 3  | 1  | 1  | 3  | 2  | 1 | 4  | 3  | 1  | 2  | 2  | 4  |   |
| 84    | 96-0568-002 (Arno)  | KASP     | 3              | 4  | 2  | 2  | 1  | 2 | 3  | 2  | 1  | 4  | 0  | 3  | 1  | 1  | 3  | 2  | 1 | 4  | 3  | 1  | 2  | 2  | 4  |   |
| 93    | 96-232-27           | SeqSNP   | 3              | 3  | 0  | 0  | 1  | 1 | 1  | 2  | 1  | 1  | 1  | 1  | 2  | 2  | 1  | 2  | 2 | 1  | 2  | 1  | 1  | 3  | 3  |   |
| 93    | 96-232-27           | KASP     | 3              | 3  | 0  | 0  | 1  | 1 | 1  | 2  | 1  | 1  | 1  | 1  | 2  | 2  | 1  | 2  | 2 | 1  | 2  | 1  | 1  | 3  | 3  |   |
| 95    | Abnaki              | SeqSNP   | 1              | 1  | 0  | 1  | 2  | 0 | 0  | 2  | 2  | 0  | 2  | 1  | 2  | 2  | 3  | 0  | 3 | 2  | 2  | 2  | 2  | 2  | 4  |   |
| 106   | Accent              | SeqSNP   | 2              | 0  | 2  | 2  | 2  | 2 | 2  | 3  | 3  | 4  | 1  | 2  | 2  | 2  | 2  | 4  | 2 | 2  | 2  | 3  | 1  | 2  | 2  |   |
| 192   | Adabo               | SeqSNP   | 3              | 3  | 2  | 3  | 4  | 4 | 3  | 0  | 1  | 3  | 1  | 1  | 1  | 1  | 1  | 4  | 1 | 1  | 3  | 1  | 4  | 3  | 3  |   |
| 192   | Adabo               | KASP     | 3              | 3  | 2  | 3  | 4  | 4 | 3  | 0  | 1  | 3  | 1  | 1  | 1  | 1  | 1  | 4  | 1 | 1  | 3  | 1  | 4  | 3  | 3  |   |
| 99    | Advira              | SeqSNP   | 3              | 1  | 3  | 1  | 2  | 1 | 3  | 3  | 4  | 2  | 3  | 4  | 2  | 1  | 1  | 2  | 2 | 2  | 2  | 2  | 3  | 3  | 1  |   |
| 102   | Agatha 11           | SeqSNP   | 1              | 2  | 0  | 4  | 2  | 1 | 3  | 2  | 3  | 1  | 0  | 2  | 4  | 1  | 2  | 0  | 4 | 1  | 1  | 1  | 4  | 1  | 1  |   |
| 19    | Agria               | SeqSNP   | 2              | 1  | 2  | 2  | 3  | 4 | 3  | 3  | 2  | 2  | 3  | 1  | 1  | 2  | 3  | 2  | 2 | 3  | 1  | 2  | 3  | 3  | 2  |   |
| 30    | Alamo               | SeqSNP   | 3              | 2  | 1  | 4  | 3  | 0 | 1  | 3  | 3  | 2  | 2  | 2  | 1  | 1  | 1  | 1  | 3 | 1  | 3  | 2  | 2  | 1  | 3  |   |
| 94    | Alaska 114          | SeqSNP   | 1              | 2  | 0  | 2  | 4  | 1 | 3  | 4  | 2  | 0  | 3  | 1  | 2  | 2  | 2  | 0  | 3 | 1  | 3  | 1  | 1  | 2  | 2  |   |
| 63    | Alcmaria            | SeqSNP   | 3              | 2  | 1  | 2  | 3  | 2 | 3  | 2  | 2  | 2  | 4  | 3  | 1  | 1  | 1  | 1  | 1 | 2  | 3  | 2  | 3  | 2  | 2  |   |
| 90    | Amalfy              | SeqSNP   | 1              | 3  | 1  | 1  | 2  | 1 | 3  | 2  | 2  | 1  | 1  | 3  | 3  | 1  | 2  | 2  | 2 | 1  | 1  | 3  | 1  | 1  | 2  |   |
| 35    | Amapola             | SeqSNP   | 3              | 4  | 0  | 2  | 3  | 3 | 2  | 3  | 3  | 2  | 1  | 2  | 1  | 2  | 0  | 0  | 3 | 3  | 1  | 2  | 2  | 2  | 1  |   |
| 101   | Amethyst            | SeqSNP   | 4              | 2  | 1  | 2  | 3  | 2 | 1  | 1  | 2  | 2  | 1  | 2  | 2  | 0  | 2  | 1  | 1 | 1  | 0  | 3  | 3  | 3  | 2  |   |
| 101   | Amethyst            | KASP     | 4              | 2  | 1  | 2  | 3  | 2 | 1  | 1  | 2  | 2  | 1  | 2  | 2  | 0  | 2  | 1  | 1 | 1  | 0  | 3  | 3  | 3  | 2  |   |
| 119   | Amigo               | SeqSNP   | 3              | 1  | 0  | 3  | 3  | 4 | 0  | 2  | 2  | 2  | 3  | 3  | 1  | 3  | 2  | 2  | 3 | 1  | 2  | 2  | 3  | 3  | 2  |   |
| 119   | Amigo               | KASP     | 3              | 1  | 0  | 3  | 3  | 4 | 0  | 2  | 2  | 2  | 3  | 1  | 3  | 2  | 2  | 3  | 1 | 2  | 2  | 3  | 3  | 3  | 2  |   |
| 120   | Anosta              | SeqSNP   | 1              | 3  | 3  | 1  | 1  | 1 | 3  | 2  | 1  | 3  | 1  | 2  | 2  | 1  | 4  | 2  | 1 | 1  | 2  | 3  | 3  | 2  | 1  |   |
| 121   | Apache              | SeqSNP   | 1              | 2  | 3  | 4  | 2  | 2 | 3  | 2  | 2  | 2  | 3  | 3  | 3  | 1  | 1  | 3  | 4 | 3  | 0  | 1  | 4  | 2  | 3  |   |
| 60    | Arcadia Russet      | SeqSNP   | 2              | 3  | 1  | 3  | 2  | 0 | 2  | 1  | 0  | 3  | 3  | 2  | 3  | 3  | 4  | 2  | 2 | 2  | 2  | 2  | 1  | 1  | 3  |   |
| 56    | Atacama             | SeqSNP   | 2              | 2  | 3  | 2  | 2  | 3 | 4  | 2  | 1  | 1  | 2  | 4  | 4  | 2  | 1  | 3  | 0 | 4  | 1  | 1  | 2  | 3  | 3  |   |
| 56    | Atacama             | KASP     | NA             | NA | NA | NA | NA | 1 | 2  | NA | 3  | 2  | NA | 2  | NA | NA | NA | NA | 3 | 2  | NA | NA | NA | NA | NA |   |
| 87    | Atlantic            | SeqSNP   | 2              | 0  | 0  | 0  | 0  | 4 | 3  | 2  | 2  | 2  | 2  | 2  | 3  | 1  | 1  | 1  | 1 | 2  | 1  | 1  | 3  | 1  | 2  |   |
| 87    | Atlantic            | KASP     | NA             | 0  | 0  | 0  | 0  | 4 | NA | 3  | NA | NA | 1 | NA | NA | NA | NA | 1  | NA |   |
| 61    | Atzimba             | SeqSNP   | 0              | 3  | 2  | 1  | 3  | 2 | 1  | 3  | 3  | 3  | 1  | 1  | 3  | 1  | 2  | 2  | 2 | 2  | 2  | 2  | 3  | 1  | 4  |   |
| 1     | Avalanche           | SeqSNP   | 2              | 3  | 3  | 2  | 3  | 2 | 3  | 2  | 3  | 0  | 2  | 3  | 1  | 0  | 2  | 0  | 1 | 1  | 1  | 2  | 2  | 2  | 2  |   |
| 1     | Avalanche           | KASP     | 2              | 3  | 3  | 2  | 3  | 2 | 3  | 2  | 3  | 0  | 2  | 3  | 1  | 0  | 2  | 0  | 1 | 1  | 1  | 2  | 2  | 2  | 2  |   |
| 88    | Aviva               | SeqSNP   | 1              | 3  | 3  | 1  | 2  | 0 | 3  | 2  | 1  | 1  | 0  | 3  | 3  | 2  | 2  | 2  | 2 | 2  | 3  | 0  | 2  | 4  | 2  |   |
| 16    | Bake King           | SeqSNP   | 2              | 2  | 0  | 0  | 1  | 2 | 3  | 3  | 2  | 3  | 3  | 3  | 4  | 3  | 3  | 3  | 1 | 2  | 1  | 1  | 2  | 3  | 3  |   |
| 48    | Baku                | SeqSNP   | 2              | 1  | 3  | 3  | 3  | 1 | 4  | 3  | 3  | 2  | 2  | 1  | 4  | 2  | 3  | 3  | 3 | 2  | 1  | 1  | 1  | 0  | 2  | 4 |
| 122   | Barcelona           | SeqSNP   | 2              | 1  | 3  | 2  | 1  | 2 | 4  | 2  | 2  | 3  | 2  | 2  | 1  | 1  | 0  | 2  | 1 | 1  | 3  | 4  | 2  | 3  | 2  |   |
| 6     | Belmonda            | SeqSNP   | 1              | 3  | 3  | 4  | 2  | 3 | 1  | 3  | 4  | 3  | 3  | 3  | 2  | 1  | 2  | 2  | 1 | 2  | 1  | 1  | 2  | 2  | 3  |   |
| 6     | Belmonda            | KASP     | 1              | 3  | 3  | 4  | 2  | 3 | 1  | 3  | 4  | 3  | 3  | 3  | 2  | 1  | 2  | 1  | 1 | 2  | 1  | 1  | 2  | 2  | 3  |   |
| 103   | Belrus              | SeqSNP   | 3              | 3  | 3  | 2  | 3  | 1 | 3  | 1  | 0  | 3  | 3  | 1  | 2  | 2  | 1  | 1  | 3 | 3  | 3  | 1  | 0  | 2  | 4  |   |
| 52    | Binje               | SeqSNP   | 4              | 3  | 3  | 3  | 2  | 1 | 3  | 1  | 3  | 2  | 3  | 0  | 3  | 3  | 2  | 2  | 3 | 2  | 2  | 2  | 2  | 4  | 3  |   |
| 123   | Bordeaux            | SeqSNP   | 2              | 1  | 2  | 1  | 3  | 0 | 2  | 3  | 1  | 1  | 3  | 0  | 3  | 4  | 1  | 1  | 2 | 2  | 2  | 1  | 1  | 3  | 3  |   |
| 51    | Boulder             | SeqSNP   | 1              | 0  | 0  | 2  | 1  | 2 | 2  | 1  | 2  | 1  | 1  | 1  | 1  | 1  | 3  | 2  | 1 | 0  | 1  | 1  | 3  | 2  | 1  |   |
| 124   | BP1 (APO)           | SeqSNP   | 2              | 3  | 1  | 2  | 1  | 2 | 3  | 1  | 3  | 2  | 1  | 1  | 4  | 2  | 3  | 1  | 2 | 1  | 0  | 0  | 2  | 2  | 4  |   |
| 124   | BP1 (APO)           | KASP     | 2              | 3  | 1  | 2  | 1  | 2 | 2  | 1  | 3  | 2  | 1  | 1  | 4  | 2  | 3  | 1  | 2 | 1  | 0  | 0  | 2  | 2  | 4  |   |
| 124_d | BP1 (APO)_d         | SeqSNP   | 2              | 3  | 1  | 2  | 1  | 2 | 3  | 1  | 3  | 2  | 1  | 1  | 4  | 2  | 3  | 1  | 2 | 1  | 0  | 0  | 2  | 2  | 4  |   |
| 124_d | BP1 (APO)_d         | KASP     | 2              | 3  | 1  | 2  | 1  | 2 | 2  | 1  | 3  | 2  | 1  | 1  | 4  | 2  | 3  | 1  | 2 | 1  | 0  | 0  | 2  | 2  | 4  |   |
| 92    | BP1 2018            | SeqSNP   | 2              | 3  | 1  | 2  | 1  | 2 | 2  | 1  | 3  | 2  | 1  | 1  | 4  | 2  | 3  | 1  | 2 | 1  | 0  | 0  | 2  | 2  | 4  |   |
| 92    | BP1 2018            | KASP     | 2              | 3  | 1  | 2  | 1  | 2 | 2  | 1  | 3  | 2  | 1  | 1  | 4  | 2  | 3  | 1  | 2 | 1  | 0  | 0  | 2  | 2  | 4  |   |
| 92_d  | BP1 2018_d          | SeqSNP   | 2              | 3  | 1  | 2  | 1  | 2 | 2  | 1  | 3  | 2  | 1  | 1  | 4  | 2  | 3  | 1  | 2 | 1  | 0  | 0  | 2  | 2  | 4  |   |
| 92_d  | BP1 2018_d          | KASP     | 2              | 3  | 1  | 2  | 1  | 2 | 2  | 1  | 3  | 2  | 1  | 1  | 4  | 2  | 3  | 1  | 2 | 1  | 0  | 0  | 2  | 2  | 4  |   |
| 62    | Bravo               | SeqSNP   | 3              | 2  | 1  | 2  | 1  | 1 | 3  | 0  | 1  | 2  | 2  | 1  | 3  | 2  | 3  | 2  | 2 | 2  | 0  | 1  | 1  | 1  | 3  |   |
| 34    | Bright              | SeqSNP   | 2              | 2  | 3  | 1  | 1  | 2 | 3  | 1  | 3  | 2  | 2  | 3  | 3  | 1  | 2  | 0  | 4 | 2  | 1  | 3  | 2  | 2  | 3  |   |
| 125   | Bst Galler          | SeqSNP   | 2              | 1  | 2  | 2  | 1  | 0 | 3  | 1  | 0  | 2  | 2  | 1  | 3  | 3  | 3  | 4  | 1 | 1  | 3  | 2  | 1  | 2  | 2  |   |
| 50    | Buffelspoort        | SeqSNP   | 1              | 2  | 0  | 3  | 3  | 3 | 2  | 1  | 1  | 2  | 1  | 3  | 0  | 0  | 3  | 1  | 3 | 2  | 3  | 1  | 4  | 0  | 2  |   |
| 50    | Buffelspoort        | KASP     | 1              | 2  | 0  | 3  | 3  | 3 | 2  | 1  | 1  | 2  | 1  | 3  | 0  | 0  | 2  | 1  | 3 | 2  | 3  | 1  | 4  | 0  | 2  |   |
| 67    | Calibra             | SeqSNP   | 3              | 2  | 2  | 2  | 1  | 2 | 2  | 0  | 0  | 2  | 1  | 2  | 4  | 0  | 2  | 1  | 3 | 1  | 2  | 1  | 2  | 3  | 3  |   |
| 83    | Calimero            | SeqSNP   | 2              | 3  | 1  | 2  | 1  | 2 | 3  | 1  | 3  | 2  | 1  | 1  | 4  | 2  | 3  | 1  | 2 | 1  | 0  | 0  | 2  | 2  | 4  |   |
| 97    | Caren               | SeqSNP   | 2              | 2  | 1  | 2  | 1  | 2 | 3  |    |    |    |    |    |    |    |    |    |   |    |    |    |    |    |    |   |

|       |                   | KASP SNP assay |    |    |    |    |    |    |    |    |    |    |    |    |    |    |    |    |    |    |    |    |    |     |   |
|-------|-------------------|----------------|----|----|----|----|----|----|----|----|----|----|----|----|----|----|----|----|----|----|----|----|----|-----|---|
| gDNA# | Cultivar name     | Genotype       | A  | C  | D  | E  | F  | G  | H  | J  | K  | L  | M  | N  | O  | P  | Q  | R  | S  | T  | U  | V  | W  | X   | Y |
| 128   | Chellah           | SeqSNP         | 2  | 4  | 2  | 2  | 3  | 1  | 3  | 2  | 3  | 2  | 3  | 3  | 3  | 0  | 2  | 2  | 3  | 2  | 3  | 1  | 3  | 3   | 3 |
| 129   | Ciklāmen(Ke.48-5) | SeqSNP         | 1  | 2  | 1  | 2  | 2  | 1  | 3  | 2  | 3  | 3  | 0  | 3  | 3  | 2  | 2  | 2  | 4  | 2  | 2  | 2  | 1  | 3   | 1 |
| 13    | Connect           | SeqSNP         | 0  | 1  | 3  | 2  | 1  | 1  | 2  | 0  | 3  | 2  | 2  | 3  | 0  | 1  | 1  | 2  | 3  | 2  | 2  | 1  | 3  | 3   | 1 |
| 13    | Connect           | KASP           | 0  | 1  | 2  | 2  | 1  | 1  | 0  | 3  | 2  | 3  | 3  | 1  | 1  | 1  | 2  | 3  | 2  | 2  | 1  | 3  | 3  | 1   |   |
| 130   | COO2321           | SeqSNP         | 2  | 1  | 1  | 1  | 3  | 0  | 1  | 1  | 3  | 2  | 2  | 1  | 2  | 3  | 4  | 1  | 3  | 2  | 2  | 2  | 2  | 2   | 2 |
| 130   | COO2321           | KASP           | 2  | 1  | 1  | 1  | 3  | 0  | 1  | 1  | 3  | 2  | 2  | 1  | 2  | 3  | 4  | 1  | 3  | 2  | 2  | 2  | 2  | 2   | 2 |
| 32    | Corne de Gatte    | SeqSNP         | 2  | 2  | 3  | 2  | 3  | 1  | 3  | 1  | 0  | 3  | 2  | 3  | 2  | 2  | 2  | 2  | 2  | 3  | 2  | 2  | 4  | 1   | 3 |
| 58    | Crebella          | SeqSNP         | 3  | 3  | 1  | 3  | 4  | 1  | 1  | 1  | 4  | 2  | 3  | 3  | 1  | 1  | 2  | 3  | 2  | 1  | 3  | 3  | 0  | 3   | 2 |
| 131   | Crispin           | SeqSNP         | 3  | 0  | 2  | 2  | 2  | 1  | 1  | 3  | 4  | 1  | 3  | 0  | 2  | 2  | 2  | 1  | 1  | 2  | 3  | 3  | 2  | 2   | 1 |
| 131   | Crispin           | KASP           | 3  | 0  | 2  | 2  | 2  | 1  | 1  | 3  | 4  | 1  | 3  | 0  | 2  | 2  | 2  | 1  | 1  | 2  | 3  | 3  | 2  | 2   | 1 |
| 132   | Crop34            | SeqSNP         | 1  | 2  | 2  | 3  | 0  | 2  | 2  | 2  | 2  | 2  | 1  | 2  | 2  | 2  | 3  | 1  | 2  | 2  | 3  | 1  | 2  | 3   | 2 |
| 132   | Crop34            | KASP           | 1  | 2  | 2  | 3  | 0  | 2  | 2  | 2  | 2  | 2  | 1  | 2  | 2  | 2  | 3  | 1  | 2  | 2  | 3  | 1  | 2  | 3   | 2 |
| 133   | Crop60 2484       | SeqSNP         | 2  | 2  | 3  | 3  | 3  | 0  | 3  | 1  | 2  | 2  | 1  | 2  | 2  | 1  | 2  | 1  | 3  | 2  | 0  | 1  | 2  | 1   | 1 |
| 133   | Crop60 2484       | KASP           | 2  | 2  | 3  | 3  | 3  | 0  | 3  | 1  | 2  | 2  | 1  | 2  | 2  | 1  | 2  | 1  | 3  | 2  | 0  | 1  | 2  | 1   | 1 |
| 134   | Cwater Russet     | SeqSNP         | 1  | 1  | 1  | 2  | 3  | 1  | 3  | 3  | 3  | 1  | 1  | 2  | 2  | 3  | 3  | 1  | 4  | 1  | 1  | 2  | 1  | 4   | 2 |
| 134   | Cwater Russet     | KASP           | 1  | 1  | 1  | 2  | 3  | 1  | 2  | 3  | 3  | 1  | 1  | 2  | 2  | 3  | 3  | 1  | 4  | 1  | 1  | 2  | 1  | 4   | 2 |
| 135   | Daisy             | SeqSNP         | 2  | 3  | 1  | 1  | 2  | 3  | 3  | 1  | 0  | 3  | 0  | 3  | 2  | 2  | 0  | 3  | 3  | 1  | 2  | 2  | 2  | 3   | 2 |
| 135   | Daisy             | KASP           | 2  | NA | 1  | 1  | 2  | 3  | 3  | NA | 0  | 3  | 0  | 3  | 2  | 2  | 0  | 3  | 3  | 1  | 2  | 2  | 2  | 3   | 2 |
| 55    | Dakchip           | SeqSNP         | 2  | 3  | 1  | 2  | 1  | 2  | 3  | 1  | 3  | 2  | 1  | 0  | 4  | 3  | 3  | 1  | 2  | 1  | 0  | 0  | 2  | 2   | 4 |
| 136   | DakotaTrailblazr  | SeqSNP         | 2  | 0  | 1  | 2  | 2  | 2  | 3  | 2  | 3  | 1  | 2  | 0  | 1  | 2  | 2  | 2  | 1  | 2  | 3  | 0  | 2  | 1   | 2 |
| 136   | DakotaTrailblazr  | KASP           | 2  | 0  | 1  | NA | 2  | 2  | 2  | 2  | 3  | 1  | 2  | 0  | 1  | 2  | 2  | 2  | 1  | 2  | 3  | 0  | 2  | 1   | 2 |
| 137   | Darius            | SeqSNP         | 3  | 2  | 1  | 3  | 0  | 0  | 1  | 3  | 3  | 1  | 0  | 2  | 2  | 3  | 2  | 2  | 4  | 2  | 2  | 2  | 3  | 2   | 4 |
| 137   | Darius            | KASP           | 2  | 2  | 1  | 3  | 0  | 0  | 1  | 3  | 3  | 1  | 0  | 2  | 2  | 3  | 2  | 2  | 4  | 2  | 2  | 2  | 3  | 2   | 4 |
| 91    | Desirée           | SeqSNP         | 0  | 3  | 2  | 2  | 2  | 3  | 1  | 3  | 1  | 2  | 1  | 3  | 3  | 2  | 2  | 3  | 2  | 2  | 1  | 3  | 1  | 2   | 2 |
| 66    | Devlin            | SeqSNP         | 2  | 3  | 2  | 3  | 1  | 1  | 1  | 3  | 2  | 2  | 0  | 2  | 2  | 1  | 0  | 2  | 3  | 2  | 2  | 2  | 0  | 2   | 3 |
| 66    | Devlin            | KASP           | 2  | 3  | 2  | 3  | 1  | 1  | 1  | 3  | 2  | 2  | 0  | 2  | 2  | 1  | 0  | 2  | 3  | 2  | 2  | 2  | 0  | 2   | 3 |
| 105   | Diamant           | SeqSNP         | 2  | 3  | 1  | 4  | 3  | 1  | 3  | 1  | 3  | 1  | 3  | 3  | 3  | 2  | 3  | 2  | 4  | 2  | 3  | 3  | 0  | 2   | 3 |
| 20    | Diana             | SeqSNP         | 0  | 2  | 1  | 1  | 2  | 3  | 1  | 1  | 2  | 2  | 2  | 4  | 2  | 2  | 3  | 2  | 3  | 2  | 1  | 3  | 1  | 3   | 3 |
| 138   | Donata            | SeqSNP         | 1  | 2  | 2  | 2  | 2  | 1  | 2  | 3  | 2  | 4  | 3  | 2  | 2  | 2  | 1  | 1  | 1  | 2  | 0  | 1  | 4  | 2   | 2 |
| 138   | Donata            | KASP           | 1  | 2  | 2  | 2  | 2  | 1  | 1  | 3  | 2  | 4  | 4  | 2  | 2  | 2  | 1  | 1  | 1  | 2  | 0  | 1  | 4  | 2   | 2 |
| 53    | Draga (Rascals)   | SeqSNP         | 2  | 0  | 3  | 4  | 3  | 0  | 0  | 2  | 2  | 3  | 1  | 2  | 0  | 1  | 3  | 1  | 3  | 2  | 2  | 2  | 4  | 3   | 1 |
| 53    | Draga (Rascals)   | KASP           | NA | 0  | NA | 4  | NA | NA | 0  | 2  | NA | NA | 1  | NA | 0  | NA | 4  | NA  | 1 |
| 116   | DT033             | SeqSNP         | 2  | 1  | 1  | 2  | 3  | 0  | 2  | 3  | 3  | 4  | 4  | 4  | 3  | 3  | 3  | 3  | 3  | 3  | 1  | 1  | 1  | 3   | 2 |
| 116   | DT033             | KASP           | 2  | 1  | 1  | 2  | 3  | 0  | 1  | 3  | 3  | 4  | 4  | 4  | 3  | 3  | 3  | 3  | 3  | 3  | 1  | 1  | 1  | 3   | 2 |
| 139   | Earliest of All   | SeqSNP         | 1  | 3  | 1  | 3  | 3  | 1  | 1  | 2  | 4  | 2  | 0  | 2  | 3  | 2  | 2  | 0  | 2  | 1  | 2  | 1  | 1  | 2   | 3 |
| 28    | Eldena            | SeqSNP         | 0  | 3  | 1  | 3  | 2  | 1  | 2  | 1  | 2  | 1  | 3  | 0  | 3  | 2  | 2  | 2  | 3  | 2  | 1  | 2  | 4  | 2   | 2 |
| 140   | Elodie            | SeqSNP         | 4  | 1  | 2  | 2  | 2  | 2  | 4  | 2  | 3  | 3  | 2  | 2  | 1  | 1  | 2  | 3  | 3  | 1  | 0  | 3  | 2  | 2   | 2 |
| 140   | Elodie            | KASP           | 4  | 1  | 2  | 2  | 2  | 2  | 4  | 2  | 3  | 3  | 3  | 2  | 1  | 1  | 2  | 3  | 3  | 1  | 0  | 3  | 2  | 2   | 2 |
| 44    | Elsa              | SeqSNP         | 0  | 4  | 2  | 1  | 2  | 1  | 0  | 3  | 2  | 3  | 4  | 2  | 1  | 3  | 1  | 1  | 2  | 2  | 1  | 3  | 1  | 2   | 3 |
| 44    | Elsa              | KASP           | 0  | 4  | 2  | 1  | 2  | 1  | 0  | 3  | 2  | 3  | 4  | 2  | 1  | 3  | 1  | 1  | 3  | 2  | 1  | 3  | 1  | 2   | 3 |
| 22    | Ernstoltz         | SeqSNP         | 1  | 2  | 2  | 2  | 2  | 2  | 0  | 1  | 4  | 1  | 2  | 3  | 1  | 4  | 3  | 2  | 3  | 1  | 4  | 1  | 3  | 2   | 2 |
| 31    | Eryn              | SeqSNP         | 2  | 3  | 1  | 4  | 0  | 1  | 3  | 3  | 1  | 1  | 2  | 1  | 3  | 3  | 1  | 2  | 4  | 3  | 2  | 2  | 2  | 3   | 2 |
| 31    | Eryn              | KASP           | 2  | NA | 1  | 4  | 0  | 1  | 2  | 3  | 1  | 1  | 3  | 1  | 3  | 3  | 1  | 2  | 4  | 3  | 2  | 2  | 2  | 3   | 2 |
| 141   | Esco              | SeqSNP         | 2  | 3  | 1  | 1  | 2  | 3  | 2  | 3  | 2  | 2  | 3  | 0  | 2  | 1  | 1  | 1  | 2  | 2  | 2  | 3  | 2  | 1   | 2 |
| 141   | Esco              | KASP           | 2  | 3  | 1  | 1  | 2  | 3  | 1  | 3  | 2  | 2  | 3  | 0  | 2  | 1  | 1  | 1  | 2  | 2  | 2  | 3  | 2  | 1   | 2 |
| 42    | Escort            | SeqSNP         | 2  | 3  | 1  | 1  | 2  | 3  | 2  | 3  | 2  | 2  | 3  | 0  | 2  | 1  | 1  | 1  | 2  | 2  | 2  | 3  | 2  | 1   | 2 |
| 111   | Esparantie        | SeqSNP         | 2  | 1  | 3  | 3  | 2  | 1  | 2  | 1  | 3  | 2  | 2  | 2  | 1  | 3  | 2  | 2  | 2  | 3  | 2  | 4  | 2  | 4   | 3 |
| 142   | Estima            | SeqSNP         | 4  | 2  | 3  | 2  | 3  | 2  | 2  | 1  | 2  | 3  | 2  | 2  | 2  | 2  | 2  | 2  | 2  | 1  | 1  | 1  | 2  | 3   | 4 |
| 143   | Evan              | SeqSNP         | 2  | 3  | 2  | 2  | 1  | 1  | 2  | 1  | 0  | 1  | 2  | 1  | 1  | 2  | 3  | 2  | 4  | 3  | 2  | 3  | 2  | 0   | 2 |
| 143   | Evan              | KASP           | 2  | 3  | 2  | 2  | 1  | 1  | 1  | 1  | 0  | 1  | 2  | 1  | 1  | 2  | 3  | 2  | 4  | 3  | 2  | 3  | 2  | 0   | 2 |
| 85    | Fabian            | SeqSNP         | 3  | 2  | 0  | 2  | 3  | 1  | 1  | 2  | 3  | 2  | 2  | 2  | 4  | 2  | 2  | 3  | 3  | 1  | 0  | 0  | 1  | 3   | 2 |
| 85    | Fabian            | KASP           | 3  | 2  | 0  | 2  | 3  | 1  | 1  | 2  | 3  | 2  | 2  | 2  | 4  | 2  | 2  | 2  | 3  | 1  | 0  | 0  | 1  | 3   | 2 |
| 25    | Fambo             | SeqSNP         | 2  | 2  | 3  | 3  | 2  | 1  | 1  | 2  | 0  | 1  | 1  | 2  | 3  | 2  | 1  | 2  | 1  | 2  | 1  | 2  | 2  | 4   | 4 |
| 46    | Fatima            | SeqSNP         | 2  | 2  | 1  | 2  | 3  | 3  | 1  | 2  | 2  | 3  | 1  | 1  | 3  | 3  | 2  | 0  | 1  | 2  | 1  | 2  | 3  | 4   | 4 |
| 43    | Felsina           | SeqSNP         | 0  | 2  | 4  | 3  | 1  | 1  | 2  | 2  | 4  | 2  | 1  | 3  | 2  | 1  | 1  | 2  | 1  | 1  | 3  | 4  | 3  | 2   | 1 |
| 43    | Felsina           | KASP           | 0  | NA | 4  | NA | 1  | NA | 1  | NA | 3  | 4  | NA | NA  | 1 |
| 144   | Fianna            | SeqSNP         | 1  | 2  | 2  | 3  | 1  | 1  | 1  | 2  | 2  | 0  | 2  | 1  | 2  | 2  | 2  | 1  | 2  | 2  | 2  | 3  | 3  | 4   | 2 |
| 144   | Fianna            | KASP           | 1  | 2  | 2  | 3  | 1  | 0  | 1  | 2  | 2  | 0  | 2  | 1  | 2  | 2  | 2  | 1  | 2  | 2  | 2  | 3  | 3  | 4   | 2 |
| 145   | Figaro            | SeqSNP         | 1  | 3  | 2  | 1  | 1  | 1  | 3  | 1  | 4  | 2  | 3  | 2  | 1  | 2  | 1  | 2  | 1  | 1  | 2  | 2  | 3  | 3   | 2 |
| 193   | FL2006            | SeqSNP         | 2  | 2  | 1  | 1  | 0  | 4  | 1  | 3  | 3  | 2  | 2  | 1  | 1  | 2  | 1  | 0  | 2  | 1  | 2  | 3  | 3  | 1   | 1 |
| 193   | FL2006            | KASP           | 2  | 2  | 1  | 1  | 0  | 4  | 1  | 3  | 3  | 2  | 2  | 1  | 1  | 2  | 1  | 0  | 2  | 1  | 2  | 3  | 3  | 1   | 1 |
| 194   | FL2108            | SeqSNP         | 2  | 2  | 2  | 2  | 2  | 3  | 0  | 0  | 2  | 2  | 1  | 4  | 2  | 0  | 2  | 1  | 3  | 1  | 1  | 2  | 3  | 3   | 2 |
| 194   | FL2108            | KASP           | 2  | 2  | 2  | 2  | 2  | 3  | 0  | 0  | 2  | 2  | 2  | 4  | 2  | 0  | 2  | 1  | 3  | 1  | 1  | 2  | 3  | 3   | 2 |
| 195   | FL2476            | SeqSNP         | 3  | 0  | 2  | 2  | 3  | 4  | 1  | 2  | 1  | 2  | 2  | 3  | 4  | 1  | 2  | 3  | 4  | 3  | 0  | 2  | 4  | 4   | 3 |
| 195   | FL2476            | KASP           | 3  | 0  | 2  | 2  | 3  | 4  | 1  | 2  | 1  | 2  | 3  | 3  | 4  | 1  | 2  | 3  | 4  | 3  | 0  | 2  | 4  | 4   | 3 |
| 146   | Folva             | SeqSNP         | 1  | 2  | 3  | 1  | 1  | 2  | 2  | 0  | 3  | 2  | 1  | 1  | 0  | 0  | 3  | 2  | 1  | 2  | 2  | 3  | 2  | 3   | 3 |
| 21    | Frisia            | SeqSNP         | 2  | 2  | 1  | 2  | 3  | 3  | 1  | 2  | 2  | 3  | 1  | 1  | 3  | 3  | 2  | 0  | 1  | 2  | 1  | 2  | 3  | 4   | 4 |
| 147   | Frodo             | SeqSNP         | 1  | 1  | 2  | 3  | 2  | 0  | 3  | 2  | 3  | 3  | 2  | 0  | 2  | 3  | 2  | 3  | 4  | 1  | 2  | 0  | 3  | 2   | 2 |
| 147   | Frodo             | KASP           | 1  | 1  | 2  | 3  | 2  | 0  | 2  | 2  | 3  | 3  | 2  | 0  | 2  | 3  | 2  | 3  | 4  | 1  | 2  | 0  | 3  | 2   | 2 |
| 148   | Galsby            | SeqSNP         | 2  | 1  | 1  | 1  | 2  | 2  | 3  | 2  | 2  | 2  | 2  | 2  | 1  | 0  | 1  | 2  | 1  | 2  | 2  | 3  | 2  | 3   | 4 |
| 39    | Gemchip           | SeqSNP         | 1  | 0  | 1  | 1  | 3  | 1  | 3  | 2  | 4  | 2  | 2  | 2  | 3  | 2  | 3  | 2  | 3  | 1  | 3  | 2  | 3  | 2   | 2 |
| 149   | Georgina          | SeqSNP         | 3  | 2  | 3  | 2  | 3  | 2  | 3  | 0  | 4  | 3  | 3  | 3  | 2  | 3  | 3  | 3  | 1  | 1  | 1  | 2  | 2  | 2</ |   |

|       |                     | KASP SNP assay |    |    |    |    |    |    |    |    |    |    |   |    |    |    |    |    |    |    |    |    |    |    |    |
|-------|---------------------|----------------|----|----|----|----|----|----|----|----|----|----|---|----|----|----|----|----|----|----|----|----|----|----|----|
| gDNA# | Cultivar name       | Genotype       | A  | C  | D  | E  | F  | G  | H  | J  | K  | L  | M | N  | O  | P  | Q  | R  | S  | T  | U  | V  | W  | X  | Y  |
| 150   | Hermes              | SeqSNP         | 3  | 2  | 4  | 2  | 2  | 2  | 0  | 2  | 3  | 1  | 2 | 2  | 4  | 1  | 3  | 2  | 3  | 3  | 1  | 1  | 2  | 3  | 1  |
| 150   | Hermes              | KASP           | 3  | 2  | 4  | 2  | 2  | 2  | 0  | 2  | 3  | 1  | 4 | 2  | 4  | 1  | 3  | 2  | 3  | 3  | 1  | 1  | 2  | 3  | 1  |
| 82    | Heriha (Rascals)    | SeqSNP         | 1  | 1  | 2  | 2  | 2  | 2  | 3  | 2  | 3  | 4  | 3 | 3  | 3  | 2  | 1  | 2  | 2  | 2  | 1  | 2  | 4  | 2  | 4  |
| 82    | Heriha (Rascals)    | KASP           | 1  | 1  | 2  | 2  | 2  | 2  | 2  | 2  | 3  | 4  | 3 | 3  | 3  | 2  | 1  | 2  | 2  | 2  | 1  | 2  | 4  | 2  | 4  |
| 69    | Hoëvelders          | SeqSNP         | 1  | 2  | 1  | 1  | 1  | 2  | 0  | 2  | 1  | 1  | 1 | 2  | 2  | 3  | 1  | 2  | 4  | 2  | 1  | 1  | 1  | 2  | 3  |
| 23    | Hudson              | SeqSNP         | 3  | 1  | 2  | 1  | 3  | 1  | 2  | 2  | 2  | 0  | 0 | 1  | 3  | 2  | 3  | 2  | 3  | 3  | 0  | 3  | 1  | 3  | 3  |
| 151   | Hydra               | SeqSNP         | 2  | 2  | 1  | 0  | 4  | 2  | 3  | 3  | 3  | 2  | 1 | 2  | 2  | 0  | 1  | 2  | 2  | 0  | 2  | 2  | 2  | 1  | 1  |
| 10    | IIZA49A1            | SeqSNP         | 2  | 2  | 3  | 1  | 4  | 1  | 2  | 2  | 2  | 1  | 1 | 2  | 1  | 2  | 3  | 1  | 2  | 2  | 1  | 2  | 2  | 1  | 3  |
| 10    | IIZA49A1            | KASP           | 2  | 2  | 3  | 1  | 4  | 1  | 2  | 2  | 2  | 1  | 1 | 2  | 1  | 2  | 3  | 1  | 2  | 2  | 1  | 2  | 2  | 1  | 3  |
| 9     | IIZASSA5            | SeqSNP         | 2  | 3  | 2  | 0  | 3  | 2  | 3  | 2  | 4  | 1  | 3 | 1  | 2  | 1  | 2  | 1  | 2  | 2  | 1  | 2  | 1  | 3  | 3  |
| 9     | IIZASSA5            | KASP           | 2  | 3  | 2  | 0  | 3  | 2  | 3  | 2  | 4  | 1  | 3 | 1  | 2  | 1  | 2  | 1  | 2  | 2  | 1  | 2  | 1  | 3  | 3  |
| 152   | Innovator           | SeqSNP         | 1  | 4  | 1  | 1  | 1  | 2  | 3  | 0  | 2  | 3  | 4 | 2  | 0  | 1  | 3  | 3  | 2  | 2  | 1  | 2  | 1  | 1  | 3  |
| 152   | Innovator           | KASP           | 1  | 4  | 1  | 1  | 1  | 2  | 2  | 0  | 2  | 3  | 4 | 2  | 1  | 1  | 3  | 3  | 2  | 2  | 1  | 2  | 1  | 1  | 3  |
| 153   | Irish Gold          | SeqSNP         | 3  | 2  | 4  | 3  | 4  | 3  | 3  | 2  | 1  | 2  | 3 | 2  | 3  | 3  | 3  | 1  | 1  | 2  | 2  | 2  | 2  | 2  | 3  |
| 154   | Isle of Jura        | SeqSNP         | 2  | 2  | 3  | 1  | 2  | 2  | 3  | 2  | 3  | 2  | 3 | 2  | 1  | 0  | 1  | 2  | 0  | 0  | 2  | 0  | 3  | 0  | 2  |
| 79    | Jelly               | SeqSNP         | 4  | 2  | 1  | 0  | 1  | 3  | 2  | 1  | 3  | 2  | 2 | 2  | 0  | 2  | 1  | 0  | 2  | 2  | 2  | 3  | 3  | 1  | 1  |
| 79    | Jelly               | KASP           | 4  | 2  | 1  | 0  | 1  | 3  | 2  | 1  | 3  | 2  | 3 | 2  | 0  | 2  | 1  | 0  | 2  | 2  | 2  | 3  | 3  | 1  | 1  |
| 115   | Jemseg              | SeqSNP         | 1  | 2  | 2  | 3  | 4  | 2  | 1  | 3  | 3  | 2  | 3 | 1  | 3  | 3  | 2  | 2  | 0  | 2  | 0  | 1  | 3  | 0  | 3  |
| 197   | Kankan              | SeqSNP         | 2  | 2  | 0  | 3  | 3  | 0  | 2  | 3  | 2  | 3  | 0 | 3  | 3  | 2  | 3  | 2  | 3  | 0  | 1  | 1  | 1  | 3  | 3  |
| 45    | Katahdin            | SeqSNP         | 2  | 2  | 1  | 1  | 3  | 1  | 3  | 3  | 3  | 2  | 2 | 2  | 4  | 1  | 2  | 0  | 2  | 1  | 1  | 0  | 2  | 2  | 2  |
| 59    | Kimb. Choice        | SeqSNP         | 3  | 4  | 2  | 2  | 2  | 0  | 2  | 3  | 1  | 1  | 1 | 3  | 3  | 3  | 1  | 3  | 4  | 2  | 2  | 1  | 2  | 3  | 3  |
| 110   | King George         | SeqSNP         | 2  | 4  | 2  | 2  | 1  | 1  | 3  | 1  | 4  | 2  | 3 | 1  | 4  | 2  | 3  | 3  | 2  | 2  | 0  | 1  | 3  | 3  | 2  |
| 110   | King George         | KASP           | NA | 4  | NA | NA | 1  | NA | NA | 1  | 4  | NA | 4 | 1  | 4  | NA | NA | 3  | NA |
| 4     | King Russet         | SeqSNP         | 4  | 4  | 1  | 1  | 0  | 1  | 1  | 0  | 1  | 2  | 4 | 0  | 0  | 2  | 2  | 3  | 2  | 2  | 2  | 3  | 3  | 2  | 1  |
| 4     | King Russet         | KASP           | 4  | 4  | 1  | 1  | 0  | 1  | 1  | 0  | 1  | 2  | 4 | 0  | 0  | 2  | 2  | 3  | 2  | 2  | 2  | 3  | 3  | 2  | 1  |
| 155   | Kingsman            | SeqSNP         | 1  | 0  | 3  | 3  | 3  | 4  | 2  | 4  | 3  | 2  | 2 | 1  | 2  | 1  | 2  | 0  | 1  | 2  | 2  | 2  | 2  | 3  | 2  |
| 155   | Kingsman            | KASP           | 1  | 0  | 3  | 3  | 3  | 4  | 2  | 4  | 3  | 2  | 2 | 1  | 2  | 1  | 2  | 0  | 1  | 2  | 2  | 2  | 2  | 3  | 2  |
| 68    | Kingson             | SeqSNP         | 1  | 2  | 1  | 2  | 1  | 2  | 1  | 1  | 3  | 1  | 2 | 2  | 3  | 2  | 0  | 1  | 2  | 2  | 1  | 0  | 1  | 3  | 1  |
| 70    | Koos Smit           | SeqSNP         | 2  | 2  | 3  | 2  | 2  | 1  | 4  | 2  | 4  | 1  | 2 | 3  | 3  | 2  | 2  | 2  | 3  | 3  | 4  | 3  | 1  | 3  | 0  |
| 70    | Koos Smit           | KASP           | 2  | 3  | 3  | 2  | 3  | 1  | 3  | 0  | 3  | 2  | 1 | 3  | 2  | 2  | 3  | 2  | 2  | 2  | 2  | 2  | 2  | 3  | 3  |
| 156   | La Strada           | SeqSNP         | 3  | 0  | 3  | 2  | 4  | 1  | 0  | 1  | 3  | 1  | 1 | 1  | 1  | 1  | 0  | 3  | 2  | 0  | 2  | 2  | 2  | 2  | 3  |
| 81    | Lady Rosetta        | SeqSNP         | 2  | 2  | 3  | 2  | 2  | 1  | 4  | 2  | 4  | 1  | 2 | 3  | 3  | 2  | 2  | 2  | 3  | 3  | 4  | 3  | 1  | 3  | 0  |
| 81    | Lady Rosetta        | KASP           | 2  | 2  | 3  | 2  | 2  | 1  | 4  | 2  | 4  | 1  | 2 | 3  | 3  | 2  | 2  | 2  | 3  | 3  | 4  | 3  | 1  | 3  | 0  |
| 11    | Lanorma             | SeqSNP         | 1  | 1  | 3  | 1  | 2  | 2  | 3  | 1  | 2  | 1  | 2 | 2  | 2  | 4  | 3  | 1  | 2  | 3  | 3  | 2  | 1  | 4  | 3  |
| 11    | Lanorma             | KASP           | 1  | 1  | 3  | 1  | 2  | 2  | 3  | 1  | 2  | 1  | 2 | 2  | 2  | 4  | 3  | 1  | 2  | 3  | 3  | 2  | 1  | 4  | 3  |
| 73    | Late Harvest        | SeqSNP         | 2  | 2  | 2  | 2  | 3  | 2  | 2  | 1  | 3  | 4  | 2 | 2  | 2  | 1  | 2  | 3  | 1  | 1  | 2  | 2  | 1  | 3  | 2  |
| 74    | Lenape              | SeqSNP         | 2  | 2  | 2  | 2  | 3  | 2  | 2  | 1  | 3  | 4  | 2 | 2  | 2  | 1  | 2  | 3  | 1  | 1  | 2  | 2  | 1  | 3  | 2  |
| 78    | Liberator           | SeqSNP         | 3  | 2  | 2  | 2  | 0  | 2  | 2  | 1  | 3  | 1  | 2 | 1  | 0  | 4  | 2  | 2  | 2  | 1  | 2  | 3  | 3  | 2  | 1  |
| 112   | Liseta (Rascals)    | SeqSNP         | 3  | 2  | 2  | 2  | 4  | 2  | 4  | 2  | 0  | 2  | 1 | 1  | 3  | 2  | 2  | 1  | 2  | 1  | 1  | 3  | 2  | 3  | 2  |
| 112   | Liseta (Rascals)    | KASP           | 3  | 2  | 1  | 2  | 4  | 2  | 4  | 2  | 0  | 2  | 1 | 1  | 3  | 2  | 2  | 1  | 2  | 1  | 1  | 3  | 2  | 3  | 2  |
| 26    | LT 7                | SeqSNP         | 3  | 1  | 1  | 1  | 1  | 3  | 3  | 1  | 3  | 0  | 3 | 1  | 1  | 3  | 3  | 2  | 2  | 3  | 0  | 2  | 3  | 3  | 2  |
| 157   | Ludmilla            | SeqSNP         | 2  | 2  | 2  | 1  | 1  | 1  | 0  | 2  | 2  | 4  | 1 | 0  | 1  | 2  | 2  | 1  | 1  | 0  | 3  | 2  | 2  | 2  | 2  |
| 158   | Magnum              | SeqSNP         | 2  | 1  | 1  | 3  | 2  | 3  | 3  | 1  | 3  | 3  | 2 | 2  | 0  | 2  | 3  | 3  | 2  | 4  | 1  | 2  | 2  | 4  | 4  |
| 158   | Magnum              | KASP           | 2  | NA | 1  | 3  | 2  | 3  | 2  | 1  | 3  | 3  | 4 | 2  | 0  | 2  | 3  | 3  | 2  | 4  | 1  | 2  | 2  | 4  | 4  |
| 159   | Manhattan           | SeqSNP         | 2  | 1  | 2  | 2  | 3  | 3  | 2  | 1  | 1  | 3  | 1 | 2  | 1  | 1  | 4  | 2  | 1  | 2  | 1  | 0  | 3  | 4  | 4  |
| 159   | Manhattan           | KASP           | NA | 1  | NA | NA | NA | 3  | 2  | NA | 1  | NA | 2 | NA | 1  | 1  | 4  | NA | 1  | NA | 1  | 0  | 3  | 4  | 4  |
| 57    | Maradonna           | SeqSNP         | 3  | 0  | 1  | 3  | 3  | 1  | 3  | 1  | 3  | 2  | 4 | 2  | 2  | 1  | 4  | 3  | 3  | 2  | 3  | 3  | 3  | 2  | 2  |
| 109   | Marfona             | SeqSNP         | 2  | 3  | 2  | 3  | 2  | 2  | 2  | 3  | 4  | 1  | 3 | 1  | 1  | 3  | 3  | 2  | 3  | 2  | 1  | 3  | 1  | 2  | 3  |
| 118   | Marijke             | SeqSNP         | 1  | 3  | 2  | 0  | 2  | 1  | 3  | 1  | 2  | 2  | 1 | 1  | 3  | 2  | 2  | 2  | 3  | 1  | 2  | 4  | 1  | 4  | 2  |
| 118   | Marijke             | KASP           | 1  | 3  | 2  | 0  | 2  | 1  | 2  | 1  | 2  | 2  | 2 | 1  | 3  | 2  | 2  | 2  | 3  | 1  | 2  | 4  | 1  | 4  | 2  |
| 75    | Maris Piper         | SeqSNP         | 4  | 3  | 3  | 3  | 2  | 0  | 3  | 1  | 3  | 3  | 2 | 3  | 4  | 2  | 2  | 2  | 3  | 3  | 1  | 1  | 2  | 1  | 2  |
| 75    | Maris Piper         | KASP           | 4  | 3  | 3  | 3  | 2  | 0  | 2  | 1  | 3  | 3  | 3 | 3  | 4  | 2  | 2  | 2  | NA | 3  | 1  | 1  | 2  | 1  | 2  |
| 107   | Marispeer           | SeqSNP         | 4  | 3  | 3  | 3  | 2  | 0  | 3  | 1  | 3  | 3  | 2 | 3  | 4  | 2  | 2  | 2  | 3  | 3  | 1  | 1  | 2  | 1  | 2  |
| 107   | Marispeer           | KASP           | 4  | 3  | 3  | 3  | 2  | 0  | 2  | 1  | 3  | 3  | 2 | 3  | 4  | 2  | 2  | 2  | 3  | 3  | 1  | 1  | 2  | 1  | 2  |
| 160   | Markies             | SeqSNP         | 1  | 3  | 2  | 2  | 2  | 3  | 1  | 3  | 3  | 2  | 2 | 0  | 2  | 2  | 1  | 3  | 1  | 2  | 2  | 3  | 3  | 4  | 1  |
| 160   | Markies             | KASP           | 1  | 3  | 1  | 2  | 2  | 3  | 1  | 3  | 3  | 2  | 3 | 0  | 2  | 2  | 1  | 3  | 1  | 2  | 2  | 3  | 3  | 4  | 1  |
| 114   | Meliose             | SeqSNP         | 2  | 2  | 3  | 3  | 2  | 2  | 2  | 2  | 1  | 3  | 2 | 2  | 4  | 2  | 4  | 2  | 2  | 1  | 2  | 3  | 3  | 3  | 4  |
| 108   | Mirakel             | SeqSNP         | 2  | 1  | 0  | 2  | 2  | 1  | 2  | 2  | 4  | 2  | 2 | 3  | 3  | 2  | 3  | 2  | 2  | 2  | 3  | 4  | 0  | 2  | 3  |
| 117   | Mnandi              | SeqSNP         | 1  | 3  | 2  | 3  | 2  | 1  | 3  | 0  | 3  | 2  | 2 | 2  | 1  | 2  | 0  | 1  | 2  | 2  | 3  | 0  | 2  | 3  | 3  |
| 117   | Mnandi              | KASP           | 1  | 3  | 2  | 3  | 2  | 1  | 2  | 1  | 3  | 2  | 2 | 2  | 1  | 2  | 0  | 1  | 3  | 2  | 3  | 0  | 2  | 3  | 3  |
| 38    | Mokgolong           | SeqSNP         | 2  | 2  | 1  | 0  | 4  | 2  | 3  | 3  | 3  | 2  | 1 | 2  | 2  | 0  | 1  | 2  | 2  | 0  | 2  | 2  | 2  | 1  | 2  |
| 24    | Monalisa            | SeqSNP         | 1  | 2  | 2  | 3  | 3  | 3  | 1  | 2  | 2  | 2  | 4 | 2  | 3  | 2  | 4  | 1  | 0  | 0  | 2  | 2  | 0  | 4  | 2  |
| 24    | Monalisa            | KASP           | NA | NA | NA | NA | NA | 3  | NA | NA | NA | NA | 4 | NA | NA | NA | 4  | NA | 0  | 0  | NA | NA | 0  | 4  | NA |
| 76    | Mondial             | SeqSNP         | 2  | 2  | 2  | 1  | 3  | 1  | 4  | 1  | 0  | 3  | 3 | 1  | 2  | 3  | 2  | 1  | 1  | 2  | 2  | 3  | 1  | 3  | 3  |
| 76    | Mondial             | KASP           | 2  | 2  | 2  | 2  | 3  | 1  | 4  | 1  | 0  | 3  | 3 | 1  | 2  | 3  | 2  | 1  | 1  | 2  | 2  | 3  | 1  | 3  | 3  |
| 27    | Mondial (Rascals)   | SeqSNP         | 2  | 2  | 2  | 1  | 3  | 1  | 4  | 1  | 0  | 3  | 3 | 1  | 2  | 3  | 2  | 1  | 1  | 2  | 2  | 3  | 1  | 3  | 3  |
| 27    | Mondial (Rascals)   | KASP           | 2  | 2  | 2  | 1  | 3  | 1  | 4  | 1  | 0  | 3  | 3 | 1  | 2  | 3  | 2  | 1  | 1  | 2  | 2  | 3  | 1  | 3  | 3  |
| 27_d  | Mondial (Rascals)_d | SeqSNP         | 2  | 2  | 2  | 1  | 3  | 1  | 4  | 1  | 0  | 3  | 3 | 1  | 2  | 3  | 2  | 1  | 1  | 2  | 2  | 3  | 1  | 3  | 3  |
| 27_d  | Mondial (Rascals)_d | KASP           | 2  | 2  | 2  | 1  | 3  | 1  | 4  | 1  | 0  | 3  | 3 | 1  | 2  | 3  | 2  | 1  | 1  | 2  | 2  | 3  | 1  | 3  | 3  |
| 76_d  | Mondial_d           | SeqSNP         | 2  | 2  | 2  | 1  | 3  | 1  | 4  | 1  | 0  | 3  | 3 | 1  | 2  | 3  | 2  | 1  | 1  | 2  | 2  | 3  | 1  | 3  | 3  |
| 76_d  | Mondial_d           | KASP           | 2  | 2  | 2  | 1  | 3  | 1  | 4  | 1  | 0  | 3  | 3 | 1  | 2  | 3  | 2  | 1  | 1  | 2  | 2  | 3  | 1  | 3  | 3  |
| 161   | Monica russet       | SeqSNP         | 1  | 4  | 1  | 1  | 1  | 2  | 3  | 0  | 2  | 3  | 4 | 2  | 1  | 1  | 3  | 3  | 2  | 2  | 1  | 2  | 1  | 1  | 3  |
| 161   | Monica russet       | KASP           | 1  | 4  | 1  | 1  | 1  | 2  | 2  | 0  | 2  | 3  | 4 | 2  | 1  | 1  | 3  | 3  | 2  | 2  | 1  | 2  | 1  | 1  | 3  |

|       |                     | KASP SNP assay |    |    |    |    |    |    |    |    |    |   |    |    |    |    |    |    |    |    |    |    |    |    |    |
|-------|---------------------|----------------|----|----|----|----|----|----|----|----|----|---|----|----|----|----|----|----|----|----|----|----|----|----|----|
| gDNA# | Cultivar name       | Genotype       | A  | C  | D  | E  | F  | G  | H  | J  | K  | L | M  | N  | O  | P  | Q  | R  | S  | T  | U  | V  | W  | X  | Y  |
| 162   | Monte Carlo         | SeqSNP         | 3  | 2  | 3  | 3  | 0  | 0  | 3  | 1  | 3  | 0 | 2  | 1  | 2  | 0  | 2  | 4  | 3  | 3  | 3  | 3  | 2  | 3  | 2  |
| 163   | Montreal            | SeqSNP         | 0  | 2  | 3  | 2  | 1  | 3  | 1  | 2  | 2  | 2 | 2  | 2  | 3  | 3  | 3  | 4  | 3  | 2  | 2  | 2  | 1  | 2  | 2  |
| 164   | Moonlight           | SeqSNP         | 1  | 2  | 4  | 0  | 4  | 0  | 3  | 1  | 2  | 3 | 3  | 2  | 3  | 1  | 1  | 2  | 4  | 3  | 2  | 1  | 1  | 3  | 4  |
| 164   | Moonlight           | KASP           | 1  | 2  | 4  | 0  | 4  | 0  | 3  | 1  | 2  | 3 | 3  | 2  | 3  | 1  | 1  | 2  | 4  | 3  | 2  | 1  | 1  | 3  | 4  |
| 40    | Morene              | SeqSNP         | 2  | 2  | 4  | 4  | 2  | 0  | 3  | 3  | 2  | 2 | 1  | 2  | 2  | 2  | 2  | 3  | 2  | 1  | 4  | 2  | 3  | 2  | 2  |
| 37    | Navaan              | SeqSNP         | 0  | 3  | 4  | 2  | 2  | 1  | 3  | 2  | 2  | 1 | 1  | 2  | 2  | 1  | 0  | 2  | 2  | 2  | 1  | 0  | 2  | 1  | 2  |
| 80    | Nicola              | SeqSNP         | 1  | 2  | 3  | 3  | 2  | 2  | 3  | 0  | 2  | 3 | 3  | 2  | 1  | 1  | 3  | 2  | 3  | 2  | 2  | 4  | 3  | 3  | 1  |
| 113   | Nooksack            | SeqSNP         | 1  | 2  | 3  | 3  | 2  | 2  | 3  | 0  | 2  | 3 | 3  | 2  | 1  | 1  | 3  | 2  | 3  | 2  | 2  | 4  | 3  | 3  | 1  |
| 77    | Norchip             | SeqSNP         | 3  | 2  | 2  | 2  | 4  | 2  | 4  | 2  | 0  | 2 | 1  | 1  | 3  | 2  | 2  | 1  | 2  | 1  | 1  | 3  | 2  | 3  | 2  |
| 41    | Norking Russet      | SeqSNP         | 2  | 3  | 3  | 2  | 3  | 2  | 3  | 0  | 3  | 3 | 1  | 3  | 2  | 2  | 3  | 2  | 2  | 2  | 2  | 2  | 3  | 4  |    |
| 7     | Noya                | SeqSNP         | 2  | 2  | 2  | 3  | 4  | 2  | 2  | 2  | 1  | 3 | 4  | 2  | 1  | 2  | 3  | 2  | 3  | 3  | 3  | 1  | 2  | 3  | 3  |
| 7     | Noya                | KASP           | 2  | 2  | 2  | 3  | 4  | 2  | 2  | 2  | 1  | 3 | 4  | 2  | 1  | 2  | 3  | 2  | 3  | 3  | 3  | 1  | 2  | 3  | 3  |
| 165   | NY 115              | SeqSNP         | 2  | 1  | 1  | 2  | 2  | 2  | 2  | 2  | 3  | 2 | 2  | 0  | 0  | 4  | 3  | 2  | 3  | 2  | 2  | 2  | 3  | 3  | 2  |
| 166   | Őszirózsa(Ke.31-56) | SeqSNP         | 1  | 3  | 3  | 3  | 2  | 2  | 2  | 2  | 3  | 3 | 3  | 2  | 3  | 3  | 2  | 4  | 2  | 0  | 3  | 1  | 1  | 4  | 2  |
| 167   | Ottawa              | SeqSNP         | 2  | 3  | 2  | 1  | 3  | 3  | 2  | 1  | 3  | 3 | 0  | 1  | 3  | 2  | 1  | 2  | 1  | 2  | 3  | 2  | 3  | 4  | 3  |
| 14    | Panamera            | SeqSNP         | 3  | 0  | 1  | 1  | 3  | 3  | 3  | 3  | 4  | 2 | 1  | 2  | 3  | 1  | 3  | 0  | 3  | 3  | 1  | 4  | 1  | 3  | 3  |
| 14    | Panamera            | KASP           | 3  | 0  | 2  | 1  | 3  | 3  | 2  | 3  | 4  | 2 | 1  | 2  | 3  | 1  | 3  | 0  | 3  | 3  | 1  | 4  | 1  | 3  | 3  |
| 168   | PentlandDell        | SeqSNP         | 2  | 1  | 3  | 2  | 3  | 0  | 3  | 1  | 1  | 3 | 0  | 1  | 2  | 0  | 3  | 3  | 2  | 2  | 0  | 2  | 1  | 4  | 3  |
| 168   | PentlandDell        | KASP           | 2  | 1  | 3  | 2  | 3  | 0  | 3  | 1  | 1  | 3 | 0  | 1  | 2  | 0  | 3  | 3  | 2  | 2  | 0  | 2  | 1  | 4  | 3  |
| 12    | Prada               | SeqSNP         | 3  | 2  | 1  | 1  | 2  | 3  | 2  | 2  | 1  | 3 | 1  | 1  | 1  | 1  | 2  | 1  | 2  | 2  | 3  | 3  | 2  | 4  | 0  |
| 12    | Prada               | KASP           | 3  | NA | 1  | 1  | 2  | 3  | 1  | 2  | 2  | 1 | 3  | 1  | 1  | 1  | 2  | 1  | 2  | 2  | 3  | 3  | 2  | 4  | 0  |
| 169   | Record              | SeqSNP         | 2  | 3  | 2  | 4  | 2  | 2  | 1  | 3  | 2  | 2 | 2  | 1  | 4  | 3  | 1  | 3  | 3  | 2  | 1  | 3  | 2  | 1  | 2  |
| 170   | Renova              | SeqSNP         | 3  | 2  | 2  | 3  | 4  | 1  | 1  | 2  | 1  | 3 | 1  | 3  | 1  | 2  | 2  | 1  | 1  | 2  | 3  | 2  | 2  | 2  | 2  |
| 33    | Ronn                | SeqSNP         | 1  | 1  | 3  | 0  | 4  | 2  | 1  | 1  | 1  | 2 | 3  | 2  | 4  | 1  | 0  | 2  | 2  | 3  | 1  | 0  | 2  | 3  | 3  |
| 171   | Rotharo             | SeqSNP         | 0  | 1  | 2  | 1  | 2  | 2  | 1  | 1  | 2  | 2 | 0  | 2  | 4  | 2  | 3  | 0  | 3  | 1  | 0  | 0  | 2  | 2  | 3  |
| 171   | Rotharo             | KASP           | 0  | 1  | 2  | 1  | 2  | 2  | 1  | 1  | 2  | 2 | 0  | 2  | 4  | 2  | 3  | 0  | 3  | 1  | 0  | 0  | 2  | 2  | 3  |
| 3     | Royal               | SeqSNP         | 3  | 4  | 2  | 1  | 1  | 3  | 3  | 2  | 2  | 2 | 3  | 1  | 1  | 2  | 1  | 2  | 2  | 3  | 1  | 3  | 4  | 1  | 3  |
| 3     | Royal               | KASP           | 3  | 4  | 2  | 1  | 1  | 3  | 3  | 2  | 2  | 2 | 3  | 1  | 1  | 2  | 1  | 2  | 2  | 3  | 1  | 3  | 4  | 1  | 3  |
| 104   | Rua                 | SeqSNP         | 2  | 3  | 4  | 3  | 1  | 3  | 2  | 2  | 3  | 2 | 1  | 1  | 1  | 1  | 0  | 2  | 1  | 2  | 2  | 2  | 2  | 2  | 4  |
| 172   | Rumba               | SeqSNP         | 1  | 1  | 2  | 1  | 3  | 3  | 3  | 2  | 0  | 2 | 3  | 1  | 2  | 1  | 1  | 1  | 2  | 3  | 2  | 4  | 1  | 4  | 3  |
| 173   | Russet Burbank      | SeqSNP         | 1  | 2  | 1  | 2  | 2  | 0  | 3  | 3  | 4  | 0 | 1  | 1  | 3  | 1  | 3  | 3  | 3  | 2  | 3  | 3  | 2  | 2  | 4  |
| 173   | Russet Burbank      | KASP           | 1  | 2  | 1  | 2  | 2  | 0  | 3  | 4  | 0  | 1 | 1  | 3  | 1  | 3  | 3  | 3  | 2  | 3  | 3  | 2  | 2  | 2  | 4  |
| 174   | Russet Norkotah     | SeqSNP         | 1  | 1  | 1  | 2  | 0  | 1  | 3  | 4  | 2  | 1 | 2  | 0  | 1  | 2  | 4  | 3  | 3  | 2  | 2  | 2  | 2  | 2  | 3  |
| 174   | Russet Norkotah     | KASP           | NA | 1  | NA | NA | 0  | NA | NA | 4  | NA | 1 | NA | 0  | NA | NA | 4  | NA |
| 175   | Sabie               | SeqSNP         | 1  | 2  | 2  | 1  | 3  | 1  | 1  | 3  | 3  | 0 | 2  | 2  | 3  | 2  | 1  | 3  | 3  | 3  | 2  | 1  | 2  | 2  | 3  |
| 175   | Sabie               | KASP           | 1  | NA | 2  | 1  | NA | NA | 1  | 3  | NA | 0 | NA | NA | 3  | NA | NA | 3  | NA | NA | NA | 1  | NA | NA | NA |
| 176   | Sackfiller          | SeqSNP         | 1  | 2  | 2  | 1  | 3  | 1  | 1  | 3  | 3  | 0 | 2  | 3  | 2  | 1  | 3  | 3  | 3  | 2  | 1  | 2  | 2  | 3  | 3  |
| 176   | Sackfiller          | KASP           | 1  | NA | 2  | 1  | NA | NA | 1  | 3  | NA | 0 | NA | NA | 3  | NA | NA | NA | NA | NA | NA | 1  | NA | NA | NA |
| 177   | Sandvelder          | SeqSNP         | 3  | 2  | 0  | 3  | 1  | 1  | 1  | 1  | 2  | 1 | 1  | 1  | 3  | 2  | 2  | 2  | 2  | 2  | 0  | 1  | 2  | 2  | 4  |
| 177   | Sandvelder          | KASP           | 3  | 2  | 0  | 3  | 1  | 1  | 1  | 1  | 2  | 1 | 1  | 1  | 3  | 2  | 2  | 2  | 2  | 2  | 0  | 1  | 2  | 2  | 4  |
| 178   | Santé               | SeqSNP         | 2  | 0  | 2  | 2  | 2  | 1  | 3  | 1  | 3  | 3 | 1  | 2  | 1  | 1  | 3  | 2  | 3  | 3  | 3  | 4  | 3  | 1  | 2  |
| 179   | Sarpo Mira          | SeqSNP         | 1  | 2  | 3  | 1  | 3  | 3  | 1  | 2  | 3  | 2 | 2  | 2  | 3  | 2  | 2  | 4  | 2  | 3  | 3  | 3  | 1  | 1  | 3  |
| 180   | Shepody             | SeqSNP         | 2  | 4  | 2  | 0  | 1  | 0  | 3  | 0  | 0  | 2 | 2  | 1  | 1  | 2  | 3  | 1  | 3  | 1  | 0  | 2  | 0  | 1  | 3  |
| 180   | Shepody             | KASP           | 2  | 4  | 2  | 0  | 1  | 0  | 2  | 0  | 0  | 2 | 2  | 1  | 1  | 2  | 3  | 1  | 3  | 1  | 0  | 2  | 0  | 1  | 3  |
| 181   | Sifra               | SeqSNP         | 3  | 3  | 3  | 2  | 2  | 1  | 3  | 3  | 2  | 3 | 3  | 1  | 1  | 1  | 1  | 2  | 2  | 2  | 1  | 4  | 1  | 2  | 1  |
| 181   | Sifra               | KASP           | 3  | 3  | 3  | 2  | 2  | 1  | 3  | 3  | 2  | 3 | 3  | 1  | 1  | 1  | 1  | 2  | 2  | 2  | 1  | 4  | 1  | 2  | 1  |
| 196   | Sound               | SeqSNP         | 2  | 2  | 2  | 2  | 3  | 1  | 3  | 2  | 0  | 3 | 2  | 3  | 1  | 2  | 4  | 0  | 2  | 2  | 3  | 2  | 0  | 3  | 2  |
| 196   | Sound               | KASP           | 2  | 2  | 2  | 2  | 3  | 1  | 3  | 2  | 0  | 3 | 2  | 3  | 1  | 2  | 4  | 0  | 3  | 2  | 3  | 2  | 0  | 3  | 2  |
| 182   | Spunta              | SeqSNP         | 3  | 3  | 3  | 2  | 3  | 1  | 3  | 1  | 1  | 2 | 2  | 2  | 2  | 3  | 1  | 0  | 1  | 1  | 2  | 2  | 3  | 2  | 1  |
| 182   | Spunta              | KASP           | 3  | 3  | 3  | 2  | 3  | 1  | 3  | 1  | 1  | 2 | 2  | 2  | 2  | 3  | 1  | 0  | 1  | 1  | 2  | 2  | 3  | 2  | 1  |
| 8     | Taisiya             | SeqSNP         | 3  | 2  | 3  | 3  | 3  | 2  | 3  | 2  | 3  | 3 | 3  | 2  | 2  | 2  | 2  | 0  | 2  | 2  | 0  | 2  | 2  | 1  | 2  |
| 8     | Taisiya             | KASP           | 3  | 2  | 3  | 3  | 3  | 2  | 3  | 2  | 3  | 3 | 3  | 2  | 2  | 2  | 2  | 0  | 2  | 2  | 0  | 2  | 2  | 1  | 2  |
| 15    | Taurus              | SeqSNP         | 0  | 0  | 2  | 4  | 3  | 2  | 3  | 2  | 3  | 2 | 2  | 2  | 3  | 1  | 1  | 0  | 2  | 2  | 1  | 2  | 2  | 3  | 2  |
| 15    | Taurus              | KASP           | 0  | 0  | 2  | 4  | 3  | 2  | 3  | 2  | 3  | 2 | 2  | 2  | 3  | 1  | 1  | 0  | 2  | 2  | 1  | 2  | 2  | 3  | 2  |
| 183   | Teton Russet        | SeqSNP         | 2  | 1  | 2  | 2  | 1  | 2  | 3  | 3  | 4  | 3 | 2  | 1  | 1  | 3  | 4  | 1  | 3  | 2  | 3  | 4  | 2  | 3  | 4  |
| 183   | Teton Russet        | KASP           | 2  | 1  | 2  | 2  | 1  | 2  | 3  | 3  | 4  | 3 | 2  | 1  | 1  | 3  | 4  | 1  | 3  | 2  | 3  | 4  | 2  | 3  | 4  |
| 184   | Toronto             | SeqSNP         | 1  | 1  | 3  | 3  | 2  | 2  | 3  | 2  | 2  | 2 | 2  | 1  | 2  | 0  | 4  | 3  | 3  | 2  | 3  | 1  | 2  | 3  | 1  |
| 185   | Ulster Chief        | SeqSNP         | 1  | 1  | 1  | 2  | 3  | 2  | 3  | 2  | 2  | 2 | 4  | 1  | 0  | 1  | 1  | 2  | 1  | 2  | 0  | 2  | 1  | 4  | 1  |
| 186   | Umatilla Rus        | SeqSNP         | 2  | 0  | 1  | 2  | 2  | 0  | 3  | 2  | 2  | 2 | 3  | 0  | 2  | 0  | 3  | 1  | 2  | 2  | 1  | 3  | 2  | 2  | 2  |
| 29    | Up to Date 2007     | SeqSNP         | 1  | 2  | 2  | 1  | 3  | 1  | 1  | 3  | 3  | 0 | 2  | 2  | 3  | 2  | 1  | 3  | 3  | 3  | 2  | 1  | 2  | 2  | 3  |
| 29    | Up to Date 2007     | KASP           | 1  | 2  | 2  | 1  | 3  | 0  | 1  | 3  | 3  | 0 | 2  | 2  | 3  | 2  | 1  | 3  | 3  | 3  | 2  | 1  | 2  | 2  | 3  |
| 29_d  | Up to Date 2007_d   | SeqSNP         | 1  | 2  | 2  | 1  | 3  | 1  | 1  | 3  | 3  | 0 | 2  | 2  | 3  | 2  | 1  | 3  | 3  | 3  | 2  | 1  | 2  | 2  | 3  |
| 29_d  | Up to Date 2007_d   | KASP           | 1  | 2  | 2  | 1  | 3  | 0  | 1  | NA | 3  | 0 | 2  | 2  | 3  | 2  | 1  | 3  | 3  | 3  | 2  | 1  | 2  | 2  | 3  |
| 187   | Up to Date 2012     | SeqSNP         | 1  | 2  | 2  | 1  | 3  | 1  | 1  | 3  | 3  | 0 | 2  | 2  | 3  | 2  | 1  | 3  | 3  | 3  | 2  | 1  | 2  | 2  | 3  |
| 187   | Up to Date 2012     | KASP           | 1  | NA | 2  | 1  | 3  | 0  | 1  | 3  | 3  | 0 | 2  | 2  | 3  | 2  | 1  | 3  | 3  | 3  | 2  | 1  | 2  | 2  | 3  |
| 187_d | Up to Date 2012_d   | SeqSNP         | 1  | 2  | 2  | 1  | 3  | 1  | 1  | 3  | 3  | 0 | 2  | 2  | 3  | 2  | 1  | 3  | 3  | 3  | 2  | 1  | 2  | 2  | 3  |
| 187_d | Up to Date 2012_d   | KASP           | 1  | NA | 2  | 1  | 3  | 0  | 1  | 3  | 3  | 0 | 2  | 2  | 3  | 2  | 1  | 3  | 3  | 3  | 2  | 1  | 2  | 2  | 3  |
| 2     | Valor               | SeqSNP         | 4  | 2  | 3  | 1  | 3  | 2  | 2  | 2  | 4  | 1 | 1  | 4  | 3  | 0  | 2  | 1  | 1  | 2  | 1  | 2  | 1  | 3  | 2  |
| 2     | Valor               | KASP           | 4  | 2  | 3  | 1  | 3  | 2  | 2  | 2  | 4  | 1 | 1  | 4  | 3  | 0  | 2  | 1  | 1  | 2  | 1  | 2  | 1  | 3  | 2  |
| 189   | VanDerPlank         | SeqSNP         | 3  | 2  | 3  | 3  | 2  | 1  | 3  | 2  | 0  | 3 | 2  | 1  | 0  | 1  | 3  | 1  | 3  | 1  | 3  | 4  | 2  | 1  | 2  |
| 189   | VanDerPlank         | KASP           | 3  | 2  | 3  | 3  | 2  | 1  | 2  | 2  | 0  | 3 | 3  | 1  | 0  | 1  | 3  | 1  | 3  | 1  | 3  | 4  | 2  | 1  | 2  |
| 190   | White Lady          | SeqSNP         | 1  | 2  | 4  | 3  | 3  | 0  | 3  | 0  | 1  | 1 | 1  | 3  | 1  | 2  | 1  | 1  | 4  | 1  |    |    |    |    |    |

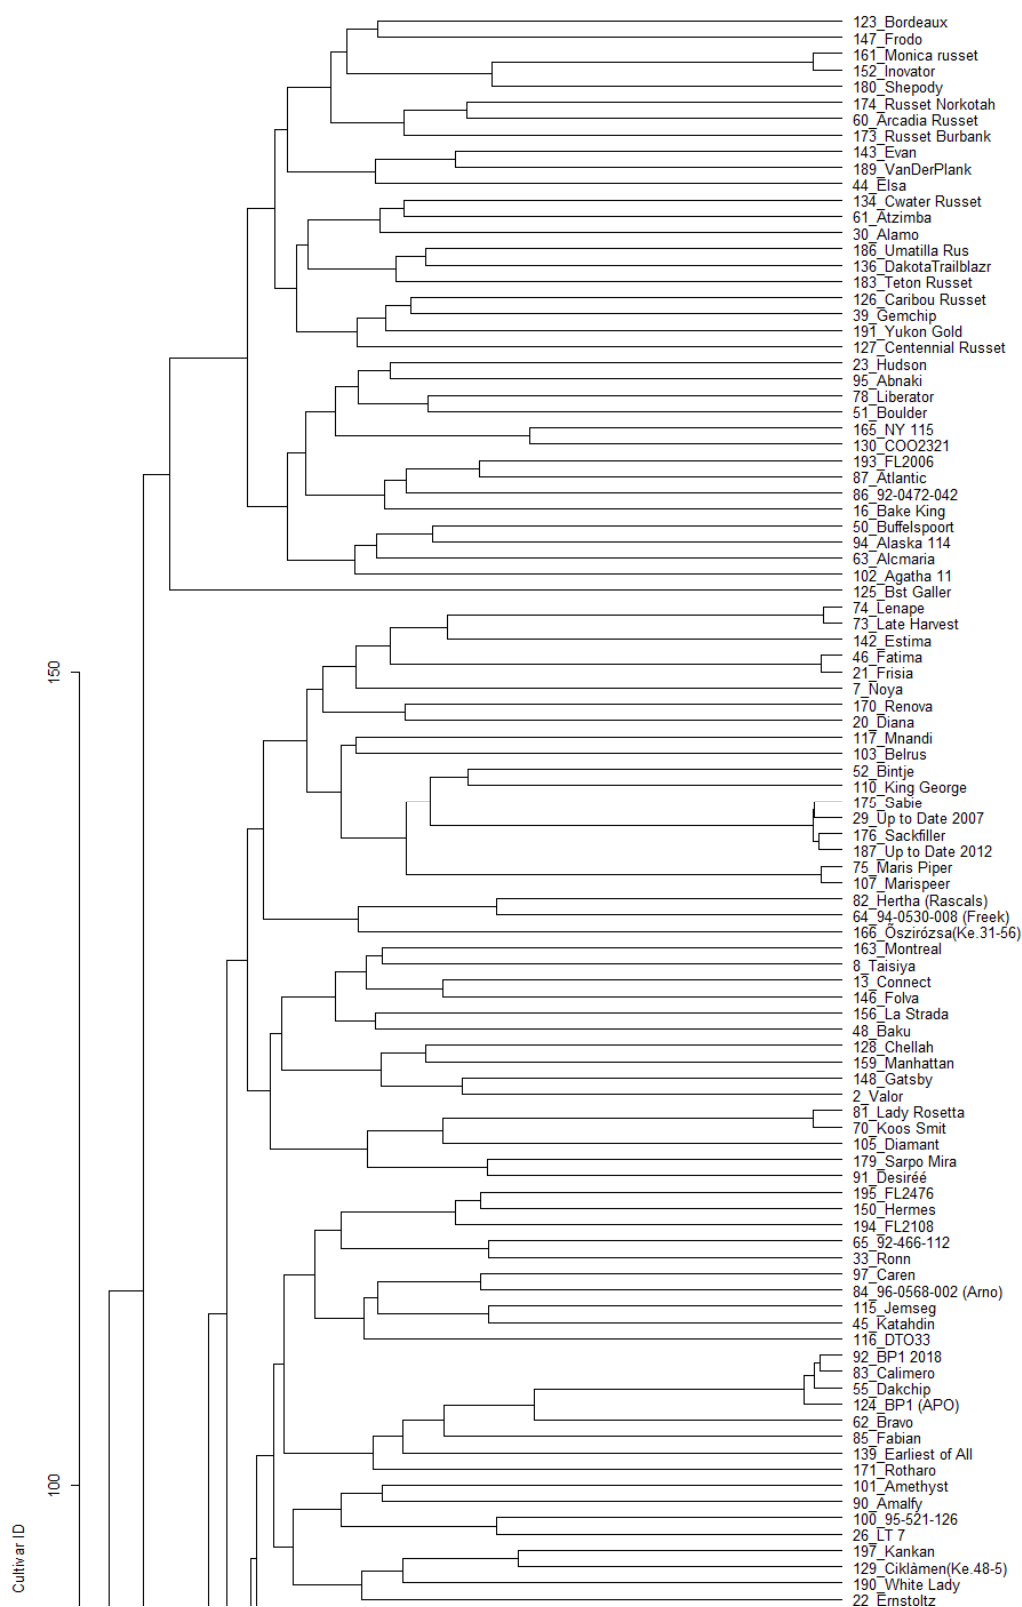



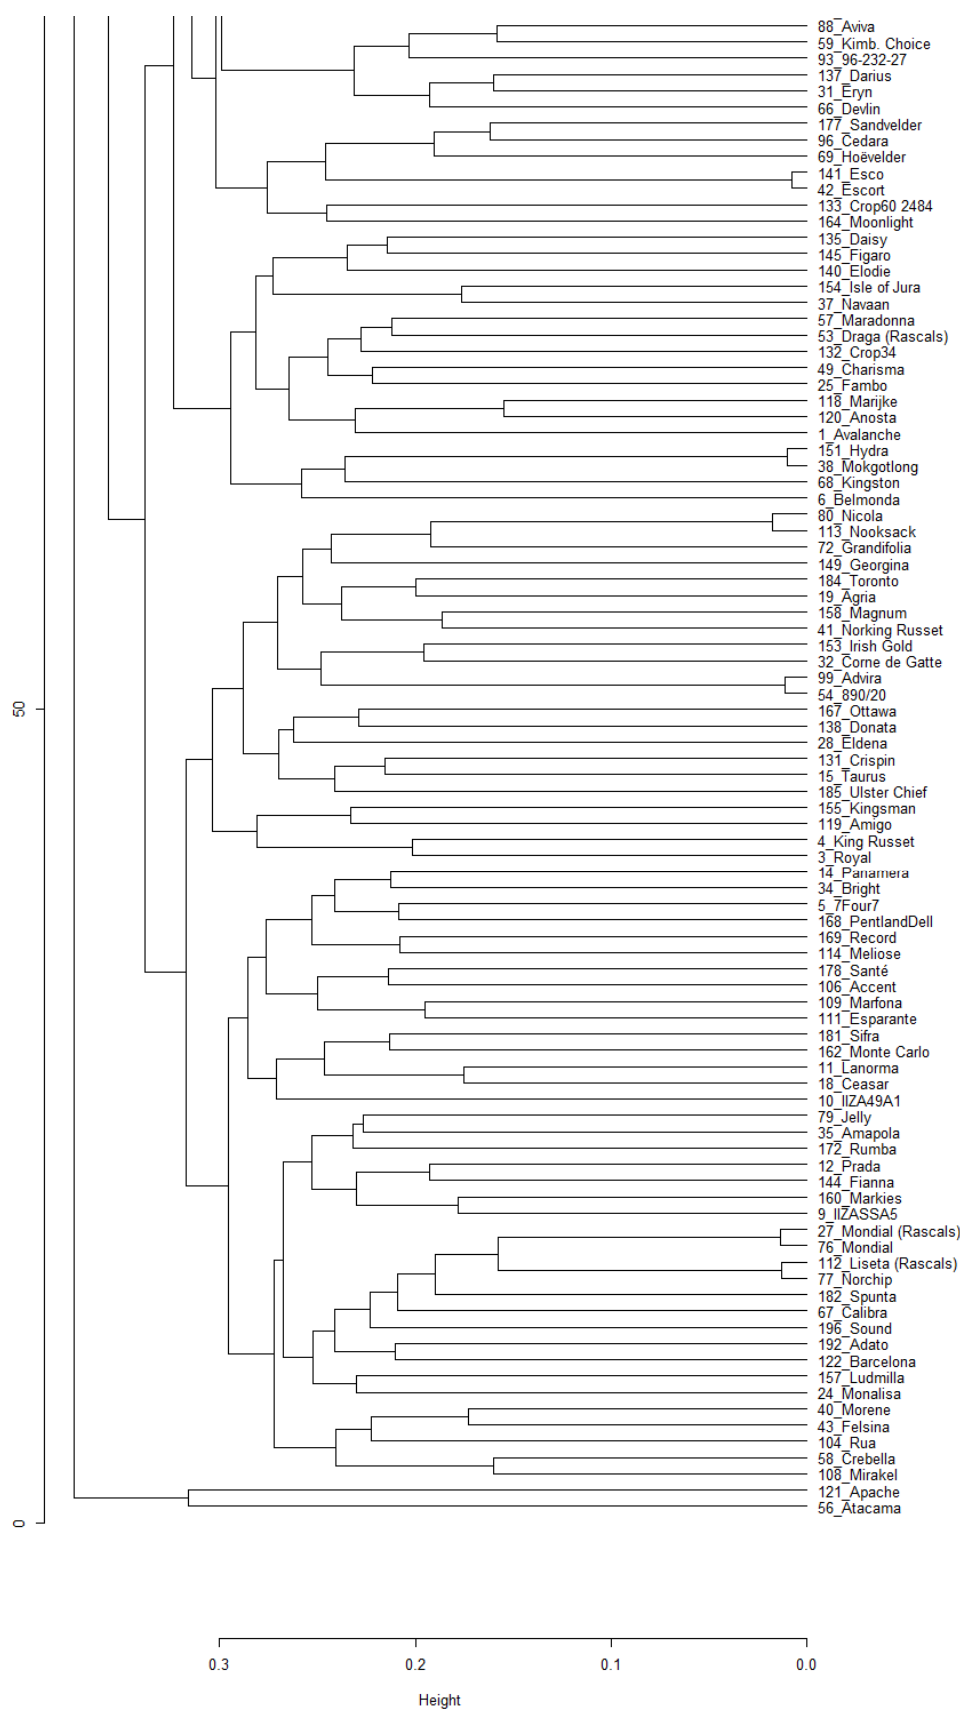

**Figure S1** (page 1 and 2). Complete cluster dendrogram of pairwise genetic distances calculated with the Kosman index of 190 cultivars genotyped with SeqSNP at 500 SNP positions.

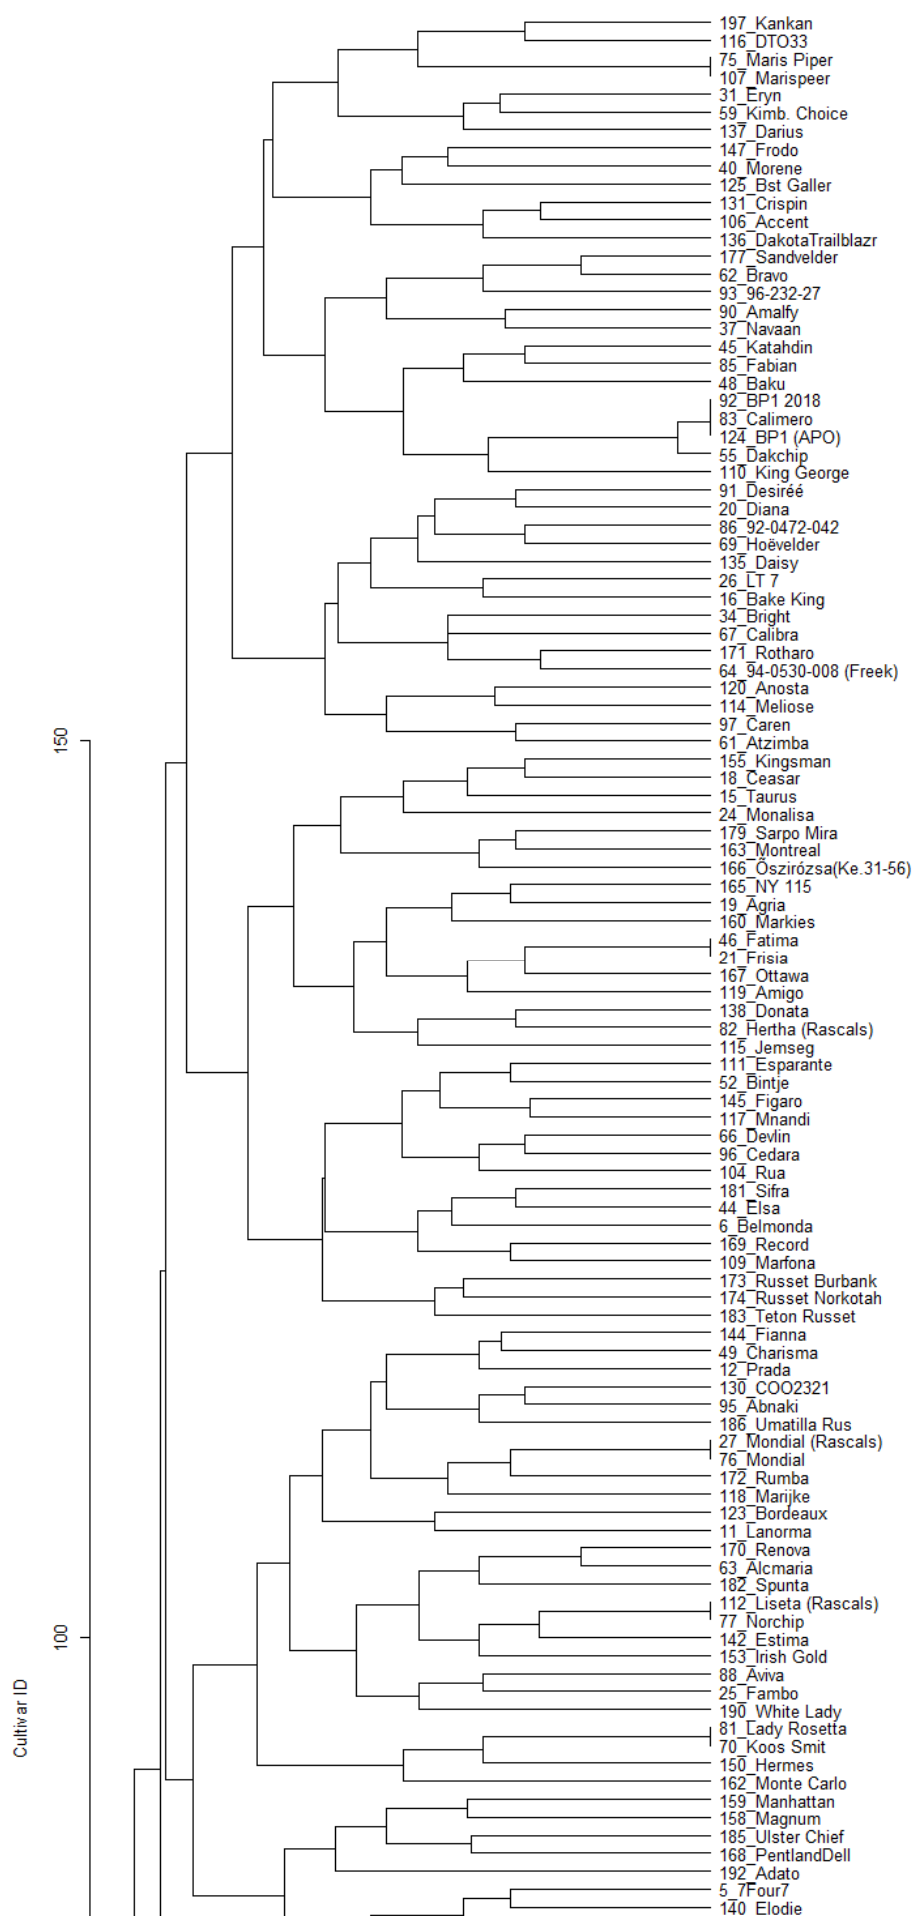

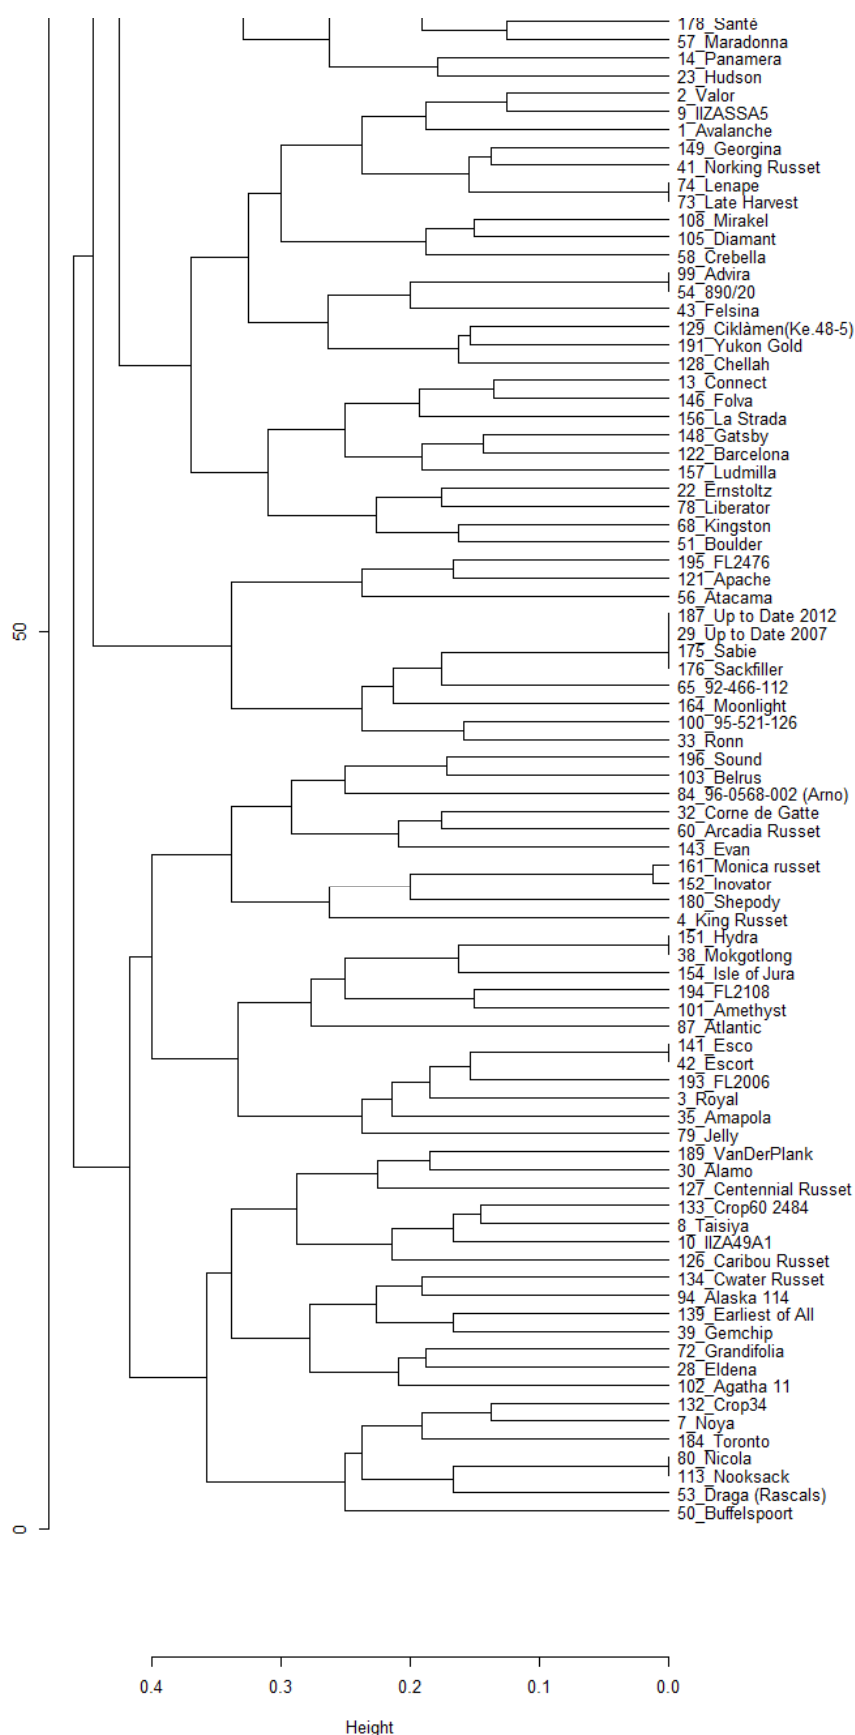

**Figure S2** (page 1 and 2). Complete cluster dendrogram of pairwise genetic distances calculated with the Kosman index of 173 cultivars genotyped with SeqSNP at 25 selected SNP positions.

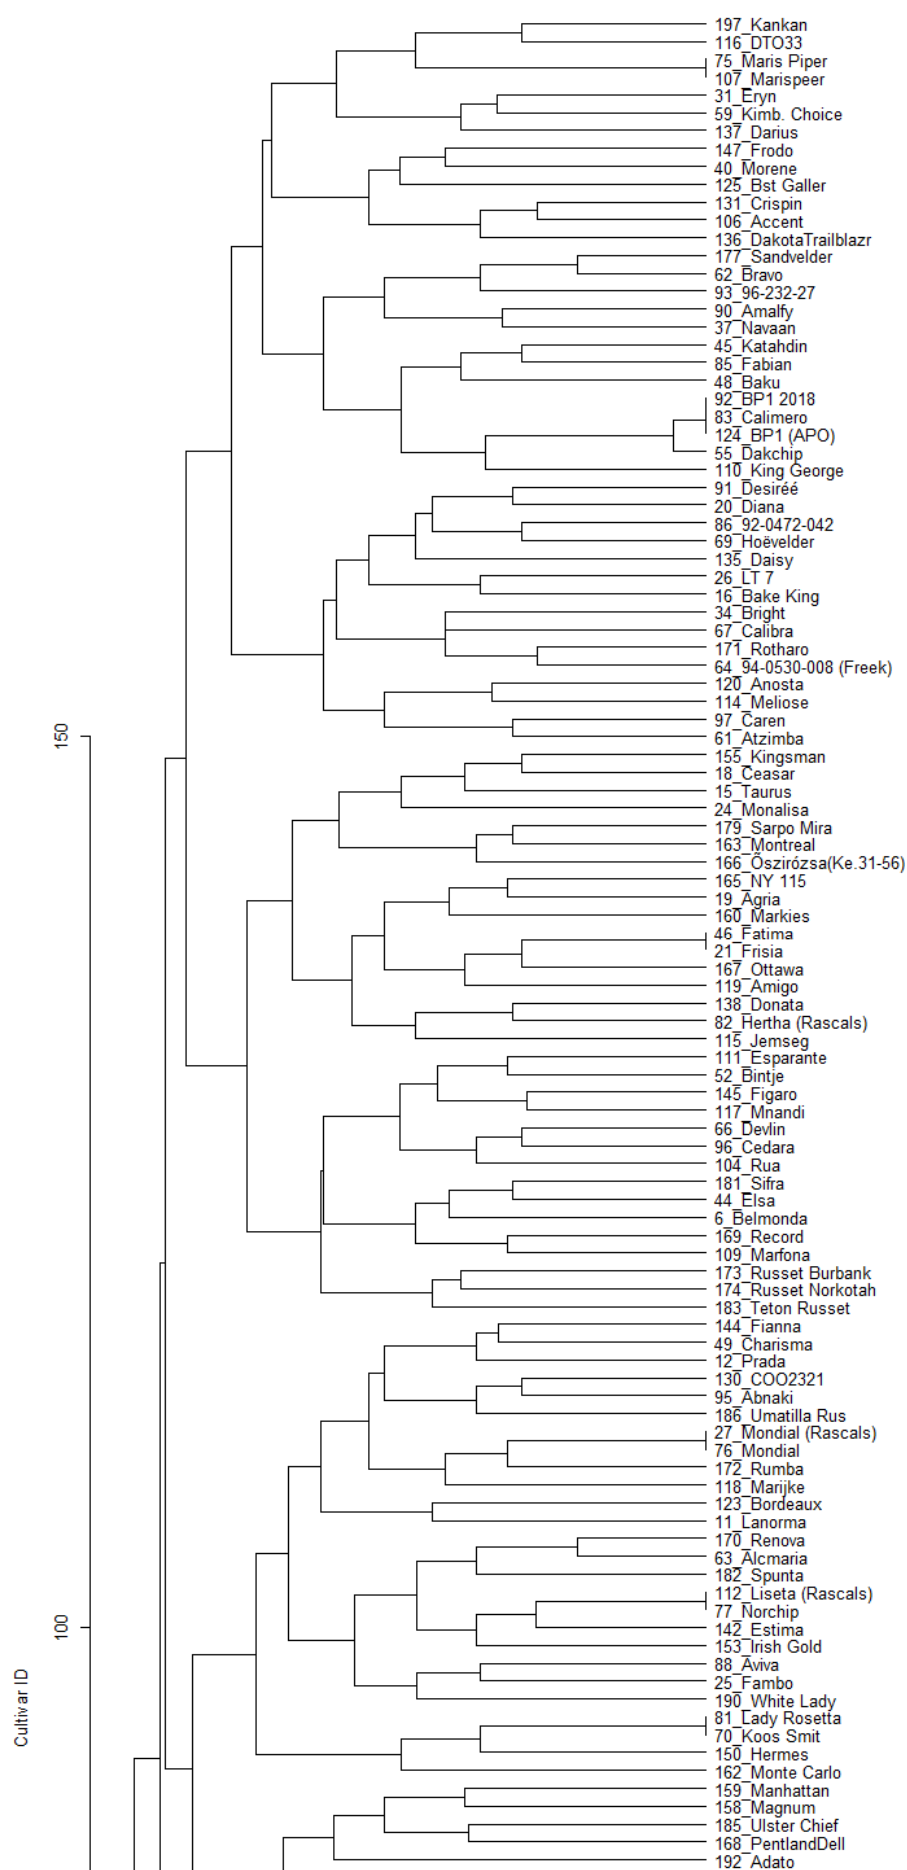

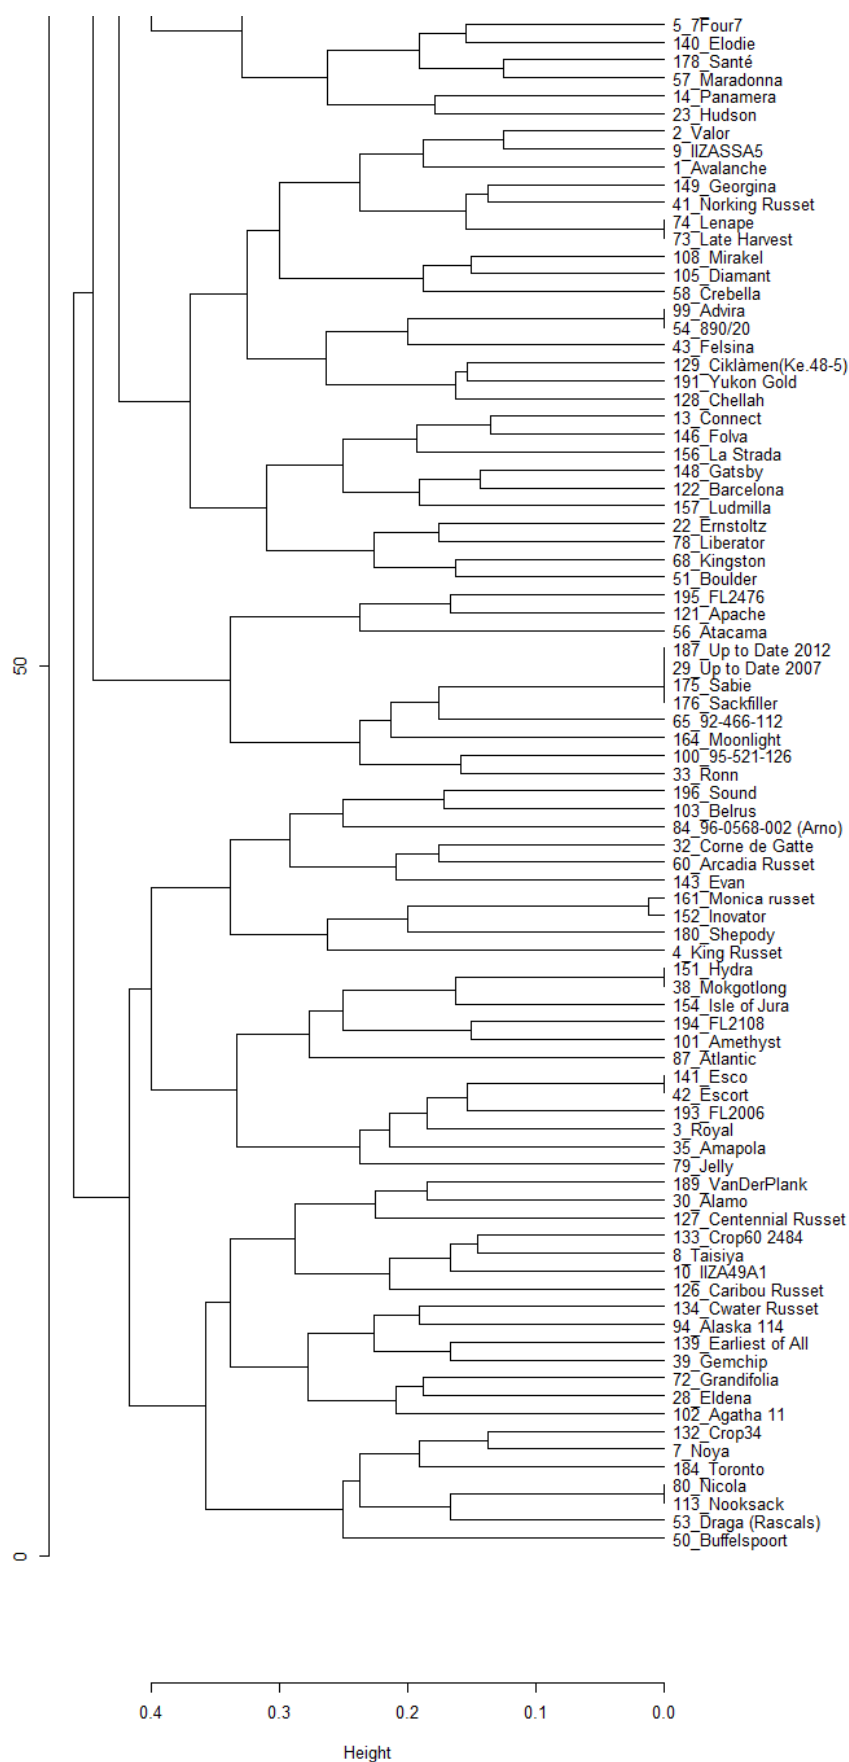

**Figure S3** (page 1 and 2). Complete cluster dendrogram of pairwise genetic distances calculated with the Kosman index of 190 cultivars genotyped with SeqSNP at the 21 selected SNP panel positions.

## Author Biography

Inge Gazendam has been a researcher at the Agricultural research council (ARC) Vegetable, Industrial and Medicinal plants (VIMP) since 2001. During this time, she has applied a variety of molecular biology, genomics, viromics, virus diagnostics and molecular marker tools to mandated vegetable and indigenous flower plants. She has also performed plant transformation to improve crops for drought and virus tolerance. Inge graduated from the University of Pretoria in 2012 with a Ph.D in Plant biotechnology where she identified various cowpea genes responding to drought stress. Functional characterisation was carried out by transforming *Arabidopsis thaliana* with a selected drought-induced cowpea gene. Her current interest is in incorporating molecular markers to modernize breeding of various vegetables at ARC-VIMP. She is involved in fingerprinting potato and sweet potato for genetic trueness-to type, and marker-assisted selection for male sterility in onion. She is an alumni of the UC-Davis African plant breeding academy (AfPBA) class IV (Dec 2019).
